# Supplementary material for: Analysis of Effect of Schisandra in the Treatment of Myocardial Infarction Based on Three-Mode Gene Ontology Network
Source: PubMed Central journal article supplement (PMC6435518; doi:10.3389/fphar.2019.00232), 2019-03-20
Supplement: Image_1.pdf [file Image_1.pdf]

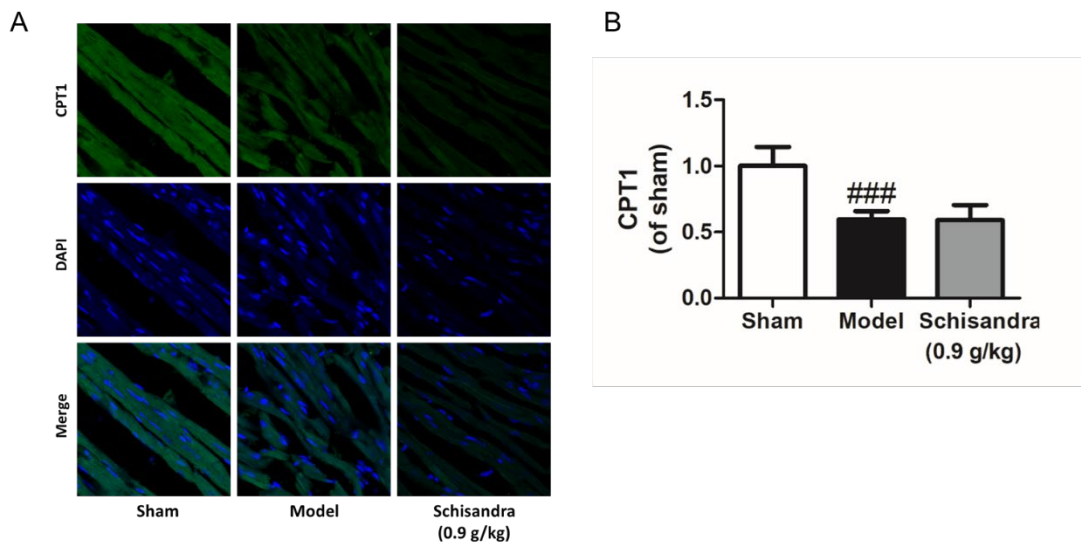

Supplementary Figure 1: The immunofluorescence of CPT1 in the heart tissue after the treatment of Schisandra. (A) The immunofluorescence staining of CPT1 in heart tissue(400 ×); (B) The quantitation of CPT1 from immunofluorescence staining results. All data are shown as the mean±S.D., ###, P<0.001 vs. Sham group.
