# Supplementary material for: Analysis of Effect of Schisandra in the Treatment of Myocardial Infarction Based on Three-Mode Gene Ontology Network
Source: Front Pharmacol. 2019 Mar 20;10:232. doi: 10.3389/fphar.2019.00232 (PMC6435518; doi:10.3389/fphar.2019.00232)
Supplement: TABLE S7 — Gene ontology terms of AMI pharmacological effects. [file Table_7.XLSX]

## Sheet: data1
	Category	Term		Weight Score
heart rate	GOTERM_BP_FAT	GO:0010033	response to organic substance	1.95553
heart rate	GOTERM_BP_FAT	GO:0009725	response to hormone stimulus	1.66176
heart rate	GOTERM_BP_FAT	GO:0009719	response to endogenous stimulus	1.64999
heart rate	SP_PIR_KEYWORDS	disulfide bond		1.73598
heart rate	UP_SEQ_FEATURE	disulfide bond		1.69211
heart rate	GOTERM_CC_FAT	GO:0005615	extracellular space	1.65164
heart rate	SP_PIR_KEYWORDS	signal		1.62948
heart rate	UP_SEQ_FEATURE	signal peptide		1.61947
heart rate	SP_PIR_KEYWORDS	glycoprotein		1.56846
heart rate	SP_PIR_KEYWORDS	Secreted		1.52559
heart rate	GOTERM_CC_FAT	GO:0044421	extracellular region part	1.51427
heart rate	UP_SEQ_FEATURE	glycosylation site:N-linked (GlcNAc...)		1.42282
heart rate	GOTERM_CC_FAT	GO:0005576	extracellular region	1.33964
heart rate	GOTERM_BP_FAT	GO:0003013	circulatory system process	1.67532
heart rate	GOTERM_BP_FAT	GO:0008015	blood circulation	1.67532
heart rate	GOTERM_BP_FAT	GO:0008217	regulation of blood pressure	1.4871
heart rate	GOTERM_BP_FAT	GO:0003018	vascular process in circulatory system	1.17396
heart rate	GOTERM_BP_FAT	GO:0009611	response to wounding	1.57308
heart rate	GOTERM_BP_FAT	GO:0006954	inflammatory response	1.20259
heart rate	GOTERM_BP_FAT	GO:0006952	defense response	1.12312
heart rate	GOTERM_BP_FAT	GO:0042592	homeostatic process	1.70398
heart rate	GOTERM_BP_FAT	GO:0048878	chemical homeostasis	1.54588
heart rate	GOTERM_BP_FAT	GO:0019725	cellular homeostasis	1.29545
heart rate	GOTERM_BP_FAT	GO:0055082	cellular chemical homeostasis	1.27975
heart rate	GOTERM_BP_FAT	GO:0050801	ion homeostasis	1.27586
heart rate	GOTERM_BP_FAT	GO:0006873	cellular ion homeostasis	1.25509
heart rate	GOTERM_BP_FAT	GO:0055066	di-, tri-valent inorganic cation homeostasis	1.18531
heart rate	GOTERM_BP_FAT	GO:0055074	calcium ion homeostasis	1.18386
heart rate	GOTERM_BP_FAT	GO:0055065	metal ion homeostasis	1.18319
heart rate	GOTERM_BP_FAT	GO:0055080	cation homeostasis	1.17773
heart rate	GOTERM_BP_FAT	GO:0006874	cellular calcium ion homeostasis	1.1685
heart rate	GOTERM_BP_FAT	GO:0030003	cellular cation homeostasis	1.1666
heart rate	GOTERM_BP_FAT	GO:0006875	cellular metal ion homeostasis	1.1639
heart rate	GOTERM_BP_FAT	GO:0030005	cellular di-, tri-valent inorganic cation homeostasis	1.15952
heart rate	GOTERM_BP_FAT	GO:0007204	elevation of cytosolic calcium ion concentration	1.01947
heart rate	GOTERM_BP_FAT	GO:0051480	cytosolic calcium ion homeostasis	1.01235
heart rate	GOTERM_CC_FAT	GO:0000267	cell fraction	1.23603
heart rate	GOTERM_CC_FAT	GO:0005626	insoluble fraction	1.10292
heart rate	GOTERM_CC_FAT	GO:0005624	membrane fraction	1.08124
heart rate	GOTERM_BP_FAT	GO:0040012	regulation of locomotion	0.92239
heart rate	GOTERM_BP_FAT	GO:0030334	regulation of cell migration	0.90969
heart rate	GOTERM_BP_FAT	GO:0051270	regulation of cell motion	0.880748
heart rate	GOTERM_BP_FAT	GO:0040017	positive regulation of locomotion	0.845373
heart rate	GOTERM_BP_FAT	GO:0030335	positive regulation of cell migration	0.827598
heart rate	GOTERM_BP_FAT	GO:0051272	positive regulation of cell motion	0.814218
heart rate	GOTERM_BP_FAT	GO:0010647	positive regulation of cell communication	0.915541
heart rate	GOTERM_BP_FAT	GO:0009967	positive regulation of signal transduction	0.838227
heart rate	GOTERM_BP_FAT	GO:0010627	regulation of protein kinase cascade	0.823907
heart rate	GOTERM_BP_FAT	GO:0010740	positive regulation of protein kinase cascade	0.810059
heart rate	GOTERM_BP_FAT	GO:0010941	regulation of cell death	1.01198
heart rate	GOTERM_BP_FAT	GO:0043067	regulation of programmed cell death	1.00622
heart rate	GOTERM_BP_FAT	GO:0042981	regulation of apoptosis	1.0058
heart rate	GOTERM_BP_FAT	GO:0060548	negative regulation of cell death	0.857984
heart rate	GOTERM_BP_FAT	GO:0043066	negative regulation of apoptosis	0.856246
heart rate	GOTERM_BP_FAT	GO:0043069	negative regulation of programmed cell death	0.849067
heart rate	GOTERM_BP_FAT	GO:0043065	positive regulation of apoptosis	0.797135
heart rate	GOTERM_BP_FAT	GO:0043068	positive regulation of programmed cell death	0.793701
heart rate	GOTERM_BP_FAT	GO:0010942	positive regulation of cell death	0.791433
heart rate	GOTERM_BP_FAT	GO:0006916	anti-apoptosis	0.762927
heart rate	GOTERM_BP_FAT	GO:0006917	induction of apoptosis	0.621645
heart rate	GOTERM_BP_FAT	GO:0012502	induction of programmed cell death	0.62077
heart rate	GOTERM_BP_FAT	GO:0008624	induction of apoptosis by extracellular signals	0.557399
heart rate	GOTERM_MF_FAT	GO:0005179	hormone activity	0.889058
heart rate	SP_PIR_KEYWORDS	hormone		0.857496
heart rate	SP_PIR_KEYWORDS	amidation		0.680287
heart rate	GOTERM_BP_FAT	GO:0044093	positive regulation of molecular function	1.12618
heart rate	GOTERM_BP_FAT	GO:0043085	positive regulation of catalytic activity	1.06233
heart rate	GOTERM_BP_FAT	GO:0042325	regulation of phosphorylation	0.939727
heart rate	GOTERM_BP_FAT	GO:0051174	regulation of phosphorus metabolic process	0.934075
heart rate	GOTERM_BP_FAT	GO:0019220	regulation of phosphate metabolic process	0.934075
heart rate	GOTERM_BP_FAT	GO:0033674	positive regulation of kinase activity	0.805131
heart rate	GOTERM_BP_FAT	GO:0051347	positive regulation of transferase activity	0.800938
heart rate	GOTERM_BP_FAT	GO:0045860	positive regulation of protein kinase activity	0.796156
heart rate	GOTERM_BP_FAT	GO:0051338	regulation of transferase activity	0.75805
heart rate	GOTERM_BP_FAT	GO:0043549	regulation of kinase activity	0.757398
heart rate	GOTERM_BP_FAT	GO:0045859	regulation of protein kinase activity	0.753247
heart rate	GOTERM_BP_FAT	GO:0043406	positive regulation of MAP kinase activity	0.653771
heart rate	GOTERM_BP_FAT	GO:0043405	regulation of MAP kinase activity	0.652224
heart rate	GOTERM_BP_FAT	GO:0000165	MAPKKK cascade	0.630733
heart rate	GOTERM_BP_FAT	GO:0032147	activation of protein kinase activity	0.619514
heart rate	GOTERM_BP_FAT	GO:0000187	activation of MAPK activity	0.572986
heart rate	GOTERM_BP_FAT	GO:0002237	response to molecule of bacterial origin	0.837888
heart rate	GOTERM_BP_FAT	GO:0032496	response to lipopolysaccharide	0.804322
heart rate	GOTERM_BP_FAT	GO:0009617	response to bacterium	0.68781
heart rate	SP_PIR_KEYWORDS	transmembrane protein		1.2847
heart rate	SP_PIR_KEYWORDS	glycoprotein		1.10212
heart rate	GOTERM_CC_FAT	GO:0044459	plasma membrane part	0.966723
heart rate	UP_SEQ_FEATURE	glycosylation site:N-linked (GlcNAc...)		0.956476
heart rate	GOTERM_CC_FAT	GO:0031226	intrinsic to plasma membrane	0.902775
heart rate	GOTERM_CC_FAT	GO:0005887	integral to plasma membrane	0.886282
heart rate	GOTERM_CC_FAT	GO:0005886	plasma membrane	0.740591
heart rate	UP_SEQ_FEATURE	topological domain:Cytoplasmic		0.607953
heart rate	SP_PIR_KEYWORDS	membrane		0.606983
heart rate	UP_SEQ_FEATURE	topological domain:Extracellular		0.602549
heart rate	SP_PIR_KEYWORDS	transmembrane		0.50203
heart rate	UP_SEQ_FEATURE	transmembrane region		0.50133
heart rate	GOTERM_CC_FAT	GO:0031224	intrinsic to membrane	0.427891
heart rate	GOTERM_CC_FAT	GO:0016021	integral to membrane	0.42789
heart rate	GOTERM_BP_FAT	GO:0051046	regulation of secretion	0.857567
heart rate	GOTERM_BP_FAT	GO:0051051	negative regulation of transport	0.817053
heart rate	GOTERM_BP_FAT	GO:0051048	negative regulation of secretion	0.666646
heart rate	GOTERM_BP_FAT	GO:0046883	regulation of hormone secretion	0.644519
heart rate	GOTERM_BP_FAT	GO:0042325	regulation of phosphorylation	0.899846
heart rate	GOTERM_BP_FAT	GO:0051174	regulation of phosphorus metabolic process	0.894195
heart rate	GOTERM_BP_FAT	GO:0019220	regulation of phosphate metabolic process	0.894195
heart rate	GOTERM_BP_FAT	GO:0001932	regulation of protein amino acid phosphorylation	0.781819
heart rate	GOTERM_BP_FAT	GO:0045937	positive regulation of phosphate metabolic process	0.745411
heart rate	GOTERM_BP_FAT	GO:0010562	positive regulation of phosphorus metabolic process	0.745411
heart rate	GOTERM_BP_FAT	GO:0042327	positive regulation of phosphorylation	0.739329
heart rate	GOTERM_BP_FAT	GO:0031399	regulation of protein modification process	0.699979
heart rate	GOTERM_BP_FAT	GO:0032268	regulation of cellular protein metabolic process	0.696327
heart rate	GOTERM_BP_FAT	GO:0001934	positive regulation of protein amino acid phosphorylation	0.687709
heart rate	GOTERM_BP_FAT	GO:0050730	regulation of peptidyl-tyrosine phosphorylation	0.660421
heart rate	GOTERM_BP_FAT	GO:0051247	positive regulation of protein metabolic process	0.649703
heart rate	GOTERM_BP_FAT	GO:0032270	positive regulation of cellular protein metabolic process	0.643121
heart rate	GOTERM_BP_FAT	GO:0031401	positive regulation of protein modification process	0.60636
heart rate	GOTERM_BP_FAT	GO:0050731	positive regulation of peptidyl-tyrosine phosphorylation	0.602621
heart rate	GOTERM_BP_FAT	GO:0009991	response to extracellular stimulus	0.788473
heart rate	GOTERM_BP_FAT	GO:0031667	response to nutrient levels	0.747997
heart rate	GOTERM_BP_FAT	GO:0007584	response to nutrient	0.604918
heart rate	GOTERM_MF_FAT	GO:0046983	protein dimerization activity	0.734921
heart rate	GOTERM_MF_FAT	GO:0042802	identical protein binding	0.605469
heart rate	GOTERM_MF_FAT	GO:0042803	protein homodimerization activity	0.591416
heart rate	GOTERM_BP_FAT	GO:0016477	cell migration	0.633692
heart rate	GOTERM_BP_FAT	GO:0006928	cell motion	0.615267
heart rate	GOTERM_BP_FAT	GO:0051674	localization of cell	0.603449
heart rate	GOTERM_BP_FAT	GO:0048870	cell motility	0.603449
heart rate	GOTERM_BP_FAT	GO:0050900	leukocyte migration	0.560787
heart rate	GOTERM_BP_FAT	GO:0048545	response to steroid hormone stimulus	0.767271
heart rate	GOTERM_BP_FAT	GO:0031960	response to corticosteroid stimulus	0.483617
heart rate	GOTERM_BP_FAT	GO:0051384	response to glucocorticoid stimulus	0.461003
heart rate	GOTERM_BP_FAT	GO:0001944	vasculature development	0.595913
heart rate	GOTERM_BP_FAT	GO:0001568	blood vessel development	0.594234
heart rate	GOTERM_BP_FAT	GO:0048514	blood vessel morphogenesis	0.57136
heart rate	GOTERM_BP_FAT	GO:0001525	angiogenesis	0.4965
heart rate	GOTERM_BP_FAT	GO:0051345	positive regulation of hydrolase activity	0.625231
heart rate	GOTERM_BP_FAT	GO:0060191	regulation of lipase activity	0.587461
heart rate	GOTERM_BP_FAT	GO:0051336	regulation of hydrolase activity	0.570782
heart rate	GOTERM_BP_FAT	GO:0060193	positive regulation of lipase activity	0.546751
heart rate	GOTERM_BP_FAT	GO:0010518	positive regulation of phospholipase activity	0.534909
heart rate	GOTERM_BP_FAT	GO:0010517	regulation of phospholipase activity	0.52904
heart rate	GOTERM_BP_FAT	GO:0048015	phosphoinositide-mediated signaling	0.526312
heart rate	GOTERM_BP_FAT	GO:0010863	positive regulation of phospholipase C activity	0.516762
heart rate	GOTERM_BP_FAT	GO:0007202	activation of phospholipase C activity	0.516762
heart rate	GOTERM_BP_FAT	GO:0007200	activation of phospholipase C activity by G-protein coupled receptor protein signaling pathway coupled to IP3 second messenger	0.480263
heart rate	GOTERM_BP_FAT	GO:0050727	regulation of inflammatory response	0.682623
heart rate	GOTERM_BP_FAT	GO:0032103	positive regulation of response to external stimulus	0.556982
heart rate	GOTERM_BP_FAT	GO:0050729	positive regulation of inflammatory response	0.448307
heart rate	GOTERM_BP_FAT	GO:0031349	positive regulation of defense response	0.408821
heart rate	GOTERM_BP_FAT	GO:0007267	cell-cell signaling	0.698878
heart rate	GOTERM_BP_FAT	GO:0019226	transmission of nerve impulse	0.494786
heart rate	GOTERM_BP_FAT	GO:0007268	synaptic transmission	0.472234
heart rate	GOTERM_BP_FAT	GO:0050877	neurological system process	0.383553
heart rate	GOTERM_BP_FAT	GO:0003018	vascular process in circulatory system	0.609754
heart rate	GOTERM_BP_FAT	GO:0050880	regulation of blood vessel size	0.57706
heart rate	GOTERM_BP_FAT	GO:0035150	regulation of tube size	0.57706
heart rate	GOTERM_BP_FAT	GO:0042310	vasoconstriction	0.408344
heart rate	GOTERM_BP_FAT	GO:0042311	vasodilation	0.389356
heart rate	GOTERM_BP_FAT	GO:0051050	positive regulation of transport	0.728503
heart rate	GOTERM_BP_FAT	GO:0051046	regulation of secretion	0.722558
heart rate	GOTERM_BP_FAT	GO:0060341	regulation of cellular localization	0.667575
heart rate	GOTERM_BP_FAT	GO:0051047	positive regulation of secretion	0.551979
heart rate	GOTERM_BP_FAT	GO:0050708	regulation of protein secretion	0.444236
heart rate	GOTERM_BP_FAT	GO:0051223	regulation of protein transport	0.432436
heart rate	GOTERM_BP_FAT	GO:0070201	regulation of establishment of protein localization	0.43242
heart rate	GOTERM_BP_FAT	GO:0051222	positive regulation of protein transport	0.423521
heart rate	GOTERM_BP_FAT	GO:0032880	regulation of protein localization	0.419244
heart rate	GOTERM_BP_FAT	GO:0050714	positive regulation of protein secretion	0.418434
heart rate	GOTERM_BP_FAT	GO:0050707	regulation of cytokine secretion	0.362525
heart rate	GOTERM_BP_FAT	GO:0042060	wound healing	0.642922
heart rate	GOTERM_BP_FAT	GO:0050878	regulation of body fluid levels	0.533776
heart rate	GOTERM_BP_FAT	GO:0007599	hemostasis	0.500381
heart rate	GOTERM_BP_FAT	GO:0007596	blood coagulation	0.487811
heart rate	GOTERM_BP_FAT	GO:0050817	coagulation	0.487811
heart rate	SP_PIR_KEYWORDS	blood coagulation		0.472958
heart rate	KEGG_PATHWAY	hsa04610:Complement and coagulation cascades		0.433116
heart rate	GOTERM_BP_FAT	GO:0010035	response to inorganic substance	0.591308
heart rate	GOTERM_BP_FAT	GO:0006979	response to oxidative stress	0.502197
heart rate	GOTERM_BP_FAT	GO:0000302	response to reactive oxygen species	0.482325
heart rate	GOTERM_BP_FAT	GO:0042542	response to hydrogen peroxide	0.447451
heart rate	GOTERM_BP_FAT	GO:0050727	regulation of inflammatory response	0.665494
heart rate	GOTERM_BP_FAT	GO:0048585	negative regulation of response to stimulus	0.509966
heart rate	GOTERM_BP_FAT	GO:0032102	negative regulation of response to external stimulus	0.458372
heart rate	GOTERM_BP_FAT	GO:0050728	negative regulation of inflammatory response	0.427139
heart rate	GOTERM_BP_FAT	GO:0031348	negative regulation of defense response	0.409575
heart rate	GOTERM_BP_FAT	GO:0019932	second-messenger-mediated signaling	0.752967
heart rate	GOTERM_BP_FAT	GO:0019935	cyclic-nucleotide-mediated signaling	0.528931
heart rate	SP_PIR_KEYWORDS	lipoprotein		0.501319
heart rate	GOTERM_BP_FAT	GO:0007187	G-protein signaling, coupled to cyclic nucleotide second messenger	0.497318
heart rate	UP_SEQ_FEATURE	lipid moiety-binding region:S-palmitoyl cysteine		0.496354
heart rate	SP_PIR_KEYWORDS	palmitate		0.488491
heart rate	SP_PIR_KEYWORDS	G protein-coupled receptor		0.478149
heart rate	SP_PIR_KEYWORDS	receptor		0.444672
heart rate	KEGG_PATHWAY	hsa04080:Neuroactive ligand-receptor interaction		0.437801
heart rate	GOTERM_MF_FAT	GO:0042277	peptide binding	0.423342
heart rate	GOTERM_MF_FAT	GO:0001653	peptide receptor activity	0.387821
heart rate	GOTERM_MF_FAT	GO:0008528	peptide receptor activity, G-protein coupled	0.387821
heart rate	GOTERM_BP_FAT	GO:0007186	G-protein coupled receptor protein signaling pathway	0.348779
heart rate	SP_PIR_KEYWORDS	transducer		0.277424
heart rate	SP_PIR_KEYWORDS	g-protein coupled receptor		0.273196
heart rate	INTERPRO	IPR017452:GPCR, rhodopsin-like superfamily		0.253123
heart rate	INTERPRO	IPR000276:7TM GPCR, rhodopsin-like		0.25294
heart rate	PIR_SUPERFAMILY	PIRSF800006:rhodopsin-like G protein-coupled receptors		0.236335
heart rate	GOTERM_BP_FAT	GO:0046890	regulation of lipid biosynthetic process	0.46061
heart rate	GOTERM_BP_FAT	GO:0019218	regulation of steroid metabolic process	0.409336
heart rate	GOTERM_BP_FAT	GO:0050810	regulation of steroid biosynthetic process	0.348903
heart rate	GOTERM_BP_FAT	GO:0043434	response to peptide hormone stimulus	0.448978
heart rate	GOTERM_BP_FAT	GO:0032868	response to insulin stimulus	0.419379
heart rate	GOTERM_BP_FAT	GO:0032870	cellular response to hormone stimulus	0.417285
heart rate	GOTERM_BP_FAT	GO:0032869	cellular response to insulin stimulus	0.325867
heart rate	GOTERM_CC_FAT	GO:0042995	cell projection	0.470985
heart rate	GOTERM_CC_FAT	GO:0043005	neuron projection	0.46922
heart rate	GOTERM_CC_FAT	GO:0043025	cell soma	0.39818
heart rate	GOTERM_CC_FAT	GO:0044463	cell projection part	0.338011
heart rate	GOTERM_CC_FAT	GO:0033267	axon part	0.327526
heart rate	GOTERM_BP_FAT	GO:0050900	leukocyte migration	0.440933
heart rate	GOTERM_BP_FAT	GO:0007626	locomotory behavior	0.438168
heart rate	GOTERM_BP_FAT	GO:0042330	taxis	0.391824
heart rate	GOTERM_BP_FAT	GO:0006935	chemotaxis	0.391824
heart rate	GOTERM_BP_FAT	GO:0060326	cell chemotaxis	0.389989
heart rate	GOTERM_BP_FAT	GO:0030595	leukocyte chemotaxis	0.380653
heart rate	GOTERM_BP_FAT	GO:0030593	neutrophil chemotaxis	0.31686
heart rate	GOTERM_BP_FAT	GO:0046883	regulation of hormone secretion	0.43731
heart rate	GOTERM_BP_FAT	GO:0002791	regulation of peptide secretion	0.361457
heart rate	GOTERM_BP_FAT	GO:0050796	regulation of insulin secretion	0.349139
heart rate	GOTERM_BP_FAT	GO:0019935	cyclic-nucleotide-mediated signaling	0.508501
heart rate	GOTERM_BP_FAT	GO:0007187	G-protein signaling, coupled to cyclic nucleotide second messenger	0.476888
heart rate	GOTERM_BP_FAT	GO:0030799	regulation of cyclic nucleotide metabolic process	0.468269
heart rate	GOTERM_BP_FAT	GO:0030802	regulation of cyclic nucleotide biosynthetic process	0.461958
heart rate	GOTERM_BP_FAT	GO:0030808	regulation of nucleotide biosynthetic process	0.461958
heart rate	GOTERM_BP_FAT	GO:0006140	regulation of nucleotide metabolic process	0.46153
heart rate	GOTERM_BP_FAT	GO:0030814	regulation of cAMP metabolic process	0.437466
heart rate	GOTERM_BP_FAT	GO:0030817	regulation of cAMP biosynthetic process	0.428942
heart rate	GOTERM_BP_FAT	GO:0019933	cAMP-mediated signaling	0.403616
heart rate	GOTERM_BP_FAT	GO:0031279	regulation of cyclase activity	0.395477
heart rate	GOTERM_BP_FAT	GO:0051339	regulation of lyase activity	0.391587
heart rate	GOTERM_BP_FAT	GO:0045761	regulation of adenylate cyclase activity	0.38923
heart rate	GOTERM_BP_FAT	GO:0007188	G-protein signaling, coupled to cAMP nucleotide second messenger	0.386885
heart rate	GOTERM_BP_FAT	GO:0031281	positive regulation of cyclase activity	0.34529
heart rate	GOTERM_BP_FAT	GO:0051349	positive regulation of lyase activity	0.34087
heart rate	GOTERM_BP_FAT	GO:0007190	activation of adenylate cyclase activity	0.336749
heart rate	GOTERM_BP_FAT	GO:0045762	positive regulation of adenylate cyclase activity	0.334572
heart rate	GOTERM_BP_FAT	GO:0010578	regulation of adenylate cyclase activity involved in G-protein signaling	0.305134
heart rate	GOTERM_BP_FAT	GO:0010579	positive regulation of adenylate cyclase activity by G-protein signaling pathway	0.305134
heart rate	GOTERM_BP_FAT	GO:0007189	activation of adenylate cyclase activity by G-protein signaling pathway	0.305134
heart rate	GOTERM_BP_FAT	GO:0031280	negative regulation of cyclase activity	0.289586
heart rate	GOTERM_BP_FAT	GO:0051350	negative regulation of lyase activity	0.289586
heart rate	GOTERM_BP_FAT	GO:0007194	negative regulation of adenylate cyclase activity	0.289586
heart rate	GOTERM_BP_FAT	GO:0007193	inhibition of adenylate cyclase activity by G-protein signaling	0.280867
heart rate	GOTERM_BP_FAT	GO:0010740	positive regulation of protein kinase cascade	0.54336
heart rate	GOTERM_BP_FAT	GO:0043122	regulation of I-kappaB kinase/NF-kappaB cascade	0.299551
heart rate	GOTERM_BP_FAT	GO:0043123	positive regulation of I-kappaB kinase/NF-kappaB cascade	0.293107
heart rate	GOTERM_BP_FAT	GO:0043269	regulation of ion transport	0.484791
heart rate	GOTERM_BP_FAT	GO:0010959	regulation of metal ion transport	0.446576
heart rate	GOTERM_BP_FAT	GO:0051924	regulation of calcium ion transport	0.4073
heart rate	GOTERM_BP_FAT	GO:0043270	positive regulation of ion transport	0.322765
heart rate	GOTERM_BP_FAT	GO:0010522	regulation of calcium ion transport into cytosol	0.300134
heart rate	GOTERM_BP_FAT	GO:0051928	positive regulation of calcium ion transport	0.265677
heart rate	SP_PIR_KEYWORDS	metalloprotein		0.575298
heart rate	SP_PIR_KEYWORDS	heme		0.506296
heart rate	SP_PIR_KEYWORDS	chromoprotein		0.469758
heart rate	SP_PIR_KEYWORDS	oxidoreductase		0.468913
heart rate	UP_SEQ_FEATURE	metal ion-binding site:Iron (heme axial ligand)		0.467717
heart rate	SP_PIR_KEYWORDS	iron		0.444367
heart rate	GOTERM_MF_FAT	GO:0046906	tetrapyrrole binding	0.44336
heart rate	GOTERM_MF_FAT	GO:0020037	heme binding	0.435659
heart rate	GOTERM_MF_FAT	GO:0009055	electron carrier activity	0.387145
heart rate	GOTERM_MF_FAT	GO:0005506	iron ion binding	0.380132
heart rate	GOTERM_BP_FAT	GO:0055114	oxidation reduction	0.375824
heart rate	SP_PIR_KEYWORDS	electron transfer		0.353782
heart rate	GOTERM_MF_FAT	GO:0019825	oxygen binding	0.340044
heart rate	SP_PIR_KEYWORDS	Monooxygenase		0.33991
heart rate	COG_ONTOLOGY	Secondary metabolites biosynthesis, transport, and catabolism		0.338933
heart rate	INTERPRO	IPR017973:Cytochrome P450, C-terminal region		0.301742
heart rate	INTERPRO	IPR002401:Cytochrome P450, E-class, group I		0.301706
heart rate	INTERPRO	IPR001128:Cytochrome P450		0.29365
heart rate	INTERPRO	IPR017972:Cytochrome P450, conserved site		0.292144
heart rate	SP_PIR_KEYWORDS	microsome		0.265277
heart rate	GOTERM_BP_FAT	GO:0017144	drug metabolic process	0.254956
heart rate	GOTERM_MF_FAT	GO:0016712	oxidoreductase activity, acting on paired donors, with incorporation or reduction of molecular oxygen, reduced flavin or flavoprotein as one donor, and incorporation of one atom of oxygen	0.240614
heart rate	GOTERM_MF_FAT	GO:0070330	aromatase activity	0.227653
heart rate	PIR_SUPERFAMILY	PIRSF000045:cytochrome P450 CYP2D6		0.220318
heart rate	KEGG_PATHWAY	hsa00830:Retinol metabolism		0.211972
heart rate	GOTERM_BP_FAT	GO:0006937	regulation of muscle contraction	0.401278
heart rate	GOTERM_BP_FAT	GO:0006940	regulation of smooth muscle contraction	0.352485
heart rate	GOTERM_BP_FAT	GO:0045933	positive regulation of muscle contraction	0.334411
heart rate	GOTERM_BP_FAT	GO:0045987	positive regulation of smooth muscle contraction	0.310663
heart rate	GOTERM_BP_FAT	GO:0048871	multicellular organismal homeostasis	0.366452
heart rate	GOTERM_BP_FAT	GO:0060249	anatomical structure homeostasis	0.350549
heart rate	GOTERM_BP_FAT	GO:0001894	tissue homeostasis	0.312223
heart rate	GOTERM_BP_FAT	GO:0051341	regulation of oxidoreductase activity	0.399084
heart rate	GOTERM_BP_FAT	GO:0051353	positive regulation of oxidoreductase activity	0.372896
heart rate	GOTERM_BP_FAT	GO:0032768	regulation of monooxygenase activity	0.358055
heart rate	GOTERM_BP_FAT	GO:0050999	regulation of nitric-oxide synthase activity	0.286386
heart rate	GOTERM_BP_FAT	GO:0032770	positive regulation of monooxygenase activity	0.282251
heart rate	GOTERM_BP_FAT	GO:0051000	positive regulation of nitric-oxide synthase activity	0.243302
heart rate	GOTERM_BP_FAT	GO:0019216	regulation of lipid metabolic process	0.506943
heart rate	GOTERM_BP_FAT	GO:0046890	regulation of lipid biosynthetic process	0.411652
heart rate	GOTERM_BP_FAT	GO:0045834	positive regulation of lipid metabolic process	0.407226
heart rate	GOTERM_BP_FAT	GO:0010565	regulation of cellular ketone metabolic process	0.325262
heart rate	GOTERM_BP_FAT	GO:0019217	regulation of fatty acid metabolic process	0.303948
heart rate	GOTERM_BP_FAT	GO:0046889	positive regulation of lipid biosynthetic process	0.28107
heart rate	GOTERM_BP_FAT	GO:0045923	positive regulation of fatty acid metabolic process	0.28107
heart rate	GOTERM_BP_FAT	GO:0042304	regulation of fatty acid biosynthetic process	0.236569
heart rate	GOTERM_BP_FAT	GO:0003084	positive regulation of systemic arterial blood pressure	0.231597
heart rate	GOTERM_BP_FAT	GO:0045723	positive regulation of fatty acid biosynthetic process	0.217899
heart rate	GOTERM_BP_FAT	GO:0030193	regulation of blood coagulation	0.339972
heart rate	GOTERM_BP_FAT	GO:0050818	regulation of coagulation	0.33851
heart rate	GOTERM_BP_FAT	GO:0050819	negative regulation of coagulation	0.328489
heart rate	GOTERM_BP_FAT	GO:0030195	negative regulation of blood coagulation	0.323945
heart rate	GOTERM_BP_FAT	GO:0042730	fibrinolysis	0.243729
heart rate	GOTERM_BP_FAT	GO:0008219	cell death	0.338745
heart rate	GOTERM_BP_FAT	GO:0016265	death	0.336063
heart rate	GOTERM_BP_FAT	GO:0012501	programmed cell death	0.331564
heart rate	GOTERM_BP_FAT	GO:0006915	apoptosis	0.325298
heart rate	SP_PIR_KEYWORDS	Apoptosis		0.230902
heart rate	GOTERM_CC_FAT	GO:0030141	secretory granule	0.392105
heart rate	GOTERM_CC_FAT	GO:0031982	vesicle	0.320763
heart rate	GOTERM_CC_FAT	GO:0031988	membrane-bounded vesicle	0.309169
heart rate	GOTERM_CC_FAT	GO:0016023	cytoplasmic membrane-bounded vesicle	0.296808
heart rate	GOTERM_CC_FAT	GO:0031410	cytoplasmic vesicle	0.287865
heart rate	GOTERM_CC_FAT	GO:0044433	cytoplasmic vesicle part	0.267839
heart rate	GOTERM_CC_FAT	GO:0030141	secretory granule	0.385573
heart rate	GOTERM_CC_FAT	GO:0031091	platelet alpha granule	0.304647
heart rate	GOTERM_CC_FAT	GO:0031983	vesicle lumen	0.301812
heart rate	GOTERM_CC_FAT	GO:0060205	cytoplasmic membrane-bounded vesicle lumen	0.292849
heart rate	GOTERM_CC_FAT	GO:0044433	cytoplasmic vesicle part	0.261308
heart rate	GOTERM_CC_FAT	GO:0031093	platelet alpha granule lumen	0.259556
heart rate	GOTERM_BP_FAT	GO:0006006	glucose metabolic process	0.337639
heart rate	GOTERM_BP_FAT	GO:0019318	hexose metabolic process	0.291663
heart rate	GOTERM_BP_FAT	GO:0005996	monosaccharide metabolic process	0.265493
heart rate	GOTERM_BP_FAT	GO:0034381	lipoprotein particle clearance	0.359225
heart rate	GOTERM_MF_FAT	GO:0008034	lipoprotein binding	0.29654
heart rate	GOTERM_MF_FAT	GO:0030169	low-density lipoprotein binding	0.218649
heart rate	GOTERM_CC_FAT	GO:0043292	contractile fiber	0.32938
heart rate	GOTERM_CC_FAT	GO:0030016	myofibril	0.323639
heart rate	GOTERM_CC_FAT	GO:0044449	contractile fiber part	0.320339
heart rate	GOTERM_CC_FAT	GO:0030017	sarcomere	0.300644
heart rate	GOTERM_CC_FAT	GO:0031674	I band	0.238255
heart rate	GOTERM_CC_FAT	GO:0030018	Z disc	0.210207
heart rate	GOTERM_BP_FAT	GO:0032583	regulation of gene-specific transcription	0.347756
heart rate	GOTERM_BP_FAT	GO:0043193	positive regulation of gene-specific transcription	0.304427
heart rate	GOTERM_BP_FAT	GO:0045893	positive regulation of transcription, DNA-dependent	0.289233
heart rate	GOTERM_BP_FAT	GO:0051254	positive regulation of RNA metabolic process	0.28688
heart rate	GOTERM_BP_FAT	GO:0010551	regulation of specific transcription from RNA polymerase II promoter	0.251622
heart rate	GOTERM_BP_FAT	GO:0010552	positive regulation of specific transcription from RNA polymerase II promoter	0.222387
heart rate	SP_PIR_KEYWORDS	cytokine		0.350618
heart rate	GOTERM_MF_FAT	GO:0005125	cytokine activity	0.292817
heart rate	KEGG_PATHWAY	hsa04060:Cytokine-cytokine receptor interaction		0.268563
heart rate	BIOCARTA	h_inflamPathway:Cytokines and Inflammatory Response		0.24553
heart rate	BIOCARTA	h_cytokinePathway:Cytokine Network		0.239584
heart rate	SP_PIR_KEYWORDS	ionic channel		0.366005
heart rate	SP_PIR_KEYWORDS	voltage-gated channel		0.354977
heart rate	SP_PIR_KEYWORDS	ion transport		0.341027
heart rate	SP_PIR_KEYWORDS	potassium transport		0.3344
heart rate	SP_PIR_KEYWORDS	potassium		0.330117
heart rate	GOTERM_MF_FAT	GO:0022843	voltage-gated cation channel activity	0.311438
heart rate	GOTERM_BP_FAT	GO:0030001	metal ion transport	0.298063
heart rate	GOTERM_BP_FAT	GO:0006812	cation transport	0.29228
heart rate	GOTERM_BP_FAT	GO:0006811	ion transport	0.28778
heart rate	GOTERM_MF_FAT	GO:0046873	metal ion transmembrane transporter activity	0.287024
heart rate	SP_PIR_KEYWORDS	transport		0.284006
heart rate	SP_PIR_KEYWORDS	potassium channel		0.280721
heart rate	GOTERM_MF_FAT	GO:0022836	gated channel activity	0.280199
heart rate	GOTERM_MF_FAT	GO:0005261	cation channel activity	0.279533
heart rate	GOTERM_MF_FAT	GO:0030955	potassium ion binding	0.278481
heart rate	INTERPRO	IPR005821:Ion transport		0.277829
heart rate	GOTERM_CC_FAT	GO:0034703	cation channel complex	0.276817
heart rate	GOTERM_MF_FAT	GO:0022832	voltage-gated channel activity	0.274313
heart rate	GOTERM_MF_FAT	GO:0005244	voltage-gated ion channel activity	0.274313
heart rate	GOTERM_MF_FAT	GO:0015267	channel activity	0.26864
heart rate	GOTERM_MF_FAT	GO:0022803	passive transmembrane transporter activity	0.268086
heart rate	GOTERM_MF_FAT	GO:0031420	alkali metal ion binding	0.267643
heart rate	GOTERM_MF_FAT	GO:0022838	substrate specific channel activity	0.265363
heart rate	UP_SEQ_FEATURE	short sequence motif:Selectivity filter		0.263657
heart rate	GOTERM_BP_FAT	GO:0006813	potassium ion transport	0.261487
heart rate	GOTERM_CC_FAT	GO:0034702	ion channel complex	0.261373
heart rate	GOTERM_MF_FAT	GO:0005249	voltage-gated potassium channel activity	0.257353
heart rate	GOTERM_BP_FAT	GO:0015672	monovalent inorganic cation transport	0.257002
heart rate	GOTERM_MF_FAT	GO:0005216	ion channel activity	0.255214
heart rate	GOTERM_MF_FAT	GO:0005267	potassium channel activity	0.238273
heart rate	GOTERM_CC_FAT	GO:0008076	voltage-gated potassium channel complex	0.230269
heart rate	GOTERM_CC_FAT	GO:0034705	potassium channel complex	0.230269
heart rate	GOTERM_MF_FAT	GO:0022834	ligand-gated channel activity	0.213824
heart rate	GOTERM_MF_FAT	GO:0015276	ligand-gated ion channel activity	0.213824
heart rate	GOTERM_BP_FAT	GO:0055085	transmembrane transport	0.185291
heart rate	SP_PIR_KEYWORDS	heparin-binding		0.287456
heart rate	GOTERM_MF_FAT	GO:0001871	pattern binding	0.281403
heart rate	GOTERM_MF_FAT	GO:0030247	polysaccharide binding	0.281403
heart rate	GOTERM_MF_FAT	GO:0005539	glycosaminoglycan binding	0.279899
heart rate	GOTERM_MF_FAT	GO:0008201	heparin binding	0.270623
heart rate	UP_SEQ_FEATURE	region of interest:Heparin-binding		0.257128
heart rate	GOTERM_MF_FAT	GO:0030246	carbohydrate binding	0.243017
heart rate	GOTERM_BP_FAT	GO:0051130	positive regulation of cellular component organization	0.329399
heart rate	GOTERM_BP_FAT	GO:0010638	positive regulation of organelle organization	0.245107
heart rate	GOTERM_BP_FAT	GO:0033043	regulation of organelle organization	0.216991
heart rate	GOTERM_BP_FAT	GO:0040008	regulation of growth	0.35024
heart rate	GOTERM_BP_FAT	GO:0008361	regulation of cell size	0.287428
heart rate	GOTERM_BP_FAT	GO:0001558	regulation of cell growth	0.26653
heart rate	GOTERM_BP_FAT	GO:0032535	regulation of cellular component size	0.260106
heart rate	GOTERM_BP_FAT	GO:0045792	negative regulation of cell size	0.230731
heart rate	GOTERM_BP_FAT	GO:0030308	negative regulation of cell growth	0.204267
heart rate	GOTERM_BP_FAT	GO:0045926	negative regulation of growth	0.203668
heart rate	GOTERM_BP_FAT	GO:0045833	negative regulation of lipid metabolic process	0.323184
heart rate	GOTERM_BP_FAT	GO:0050994	regulation of lipid catabolic process	0.259323
heart rate	GOTERM_BP_FAT	GO:0050995	negative regulation of lipid catabolic process	0.223851
heart rate	GOTERM_BP_FAT	GO:0009895	negative regulation of catabolic process	0.216045
heart rate	GOTERM_BP_FAT	GO:0001775	cell activation	0.354228
heart rate	GOTERM_BP_FAT	GO:0002520	immune system development	0.306844
heart rate	GOTERM_BP_FAT	GO:0048534	hemopoietic or lymphoid organ development	0.306201
heart rate	GOTERM_BP_FAT	GO:0030097	hemopoiesis	0.305596
heart rate	GOTERM_BP_FAT	GO:0045321	leukocyte activation	0.26808
heart rate	GOTERM_BP_FAT	GO:0002521	leukocyte differentiation	0.255402
heart rate	GOTERM_BP_FAT	GO:0046649	lymphocyte activation	0.252863
heart rate	GOTERM_BP_FAT	GO:0042110	T cell activation	0.226553
heart rate	GOTERM_BP_FAT	GO:0030098	lymphocyte differentiation	0.225066
heart rate	GOTERM_BP_FAT	GO:0042113	B cell activation	0.22033
heart rate	GOTERM_BP_FAT	GO:0030099	myeloid cell differentiation	0.210158
heart rate	GOTERM_BP_FAT	GO:0030183	B cell differentiation	0.208701
heart rate	GOTERM_BP_FAT	GO:0030217	T cell differentiation	0.181013
heart rate	GOTERM_BP_FAT	GO:0001501	skeletal system development	0.269836
heart rate	GOTERM_BP_FAT	GO:0001503	ossification	0.246145
heart rate	GOTERM_BP_FAT	GO:0060348	bone development	0.245831
heart rate	GOTERM_BP_FAT	GO:0032103	positive regulation of response to external stimulus	0.400863
heart rate	GOTERM_BP_FAT	GO:0050795	regulation of behavior	0.332976
heart rate	GOTERM_BP_FAT	GO:0048520	positive regulation of behavior	0.310981
heart rate	GOTERM_BP_FAT	GO:0002685	regulation of leukocyte migration	0.282974
heart rate	GOTERM_BP_FAT	GO:0050921	positive regulation of chemotaxis	0.261969
heart rate	GOTERM_BP_FAT	GO:0050920	regulation of chemotaxis	0.255316
heart rate	GOTERM_BP_FAT	GO:0002687	positive regulation of leukocyte migration	0.230268
heart rate	GOTERM_BP_FAT	GO:0050927	positive regulation of positive chemotaxis	0.200286
heart rate	GOTERM_BP_FAT	GO:0050926	regulation of positive chemotaxis	0.200286
heart rate	GOTERM_BP_FAT	GO:0002690	positive regulation of leukocyte chemotaxis	0.180575
heart rate	GOTERM_BP_FAT	GO:0002688	regulation of leukocyte chemotaxis	0.177889
heart rate	GOTERM_BP_FAT	GO:0050930	induction of positive chemotaxis	0.166536
heart rate	GOTERM_BP_FAT	GO:0051098	regulation of binding	0.33563
heart rate	GOTERM_BP_FAT	GO:0051101	regulation of DNA binding	0.278792
heart rate	GOTERM_BP_FAT	GO:0051090	regulation of transcription factor activity	0.274568
heart rate	GOTERM_BP_FAT	GO:0051099	positive regulation of binding	0.238689
heart rate	GOTERM_BP_FAT	GO:0043388	positive regulation of DNA binding	0.22975
heart rate	GOTERM_BP_FAT	GO:0051091	positive regulation of transcription factor activity	0.223979
heart rate	GOTERM_BP_FAT	GO:0051100	negative regulation of binding	0.21476
heart rate	GOTERM_BP_FAT	GO:0051092	positive regulation of NF-kappaB transcription factor activity	0.211381
heart rate	GOTERM_BP_FAT	GO:0043392	negative regulation of DNA binding	0.19544
heart rate	GOTERM_BP_FAT	GO:0043433	negative regulation of transcription factor activity	0.193692
heart rate	GOTERM_BP_FAT	GO:0031644	regulation of neurological system process	0.335323
heart rate	GOTERM_BP_FAT	GO:0051969	regulation of transmission of nerve impulse	0.292262
heart rate	GOTERM_BP_FAT	GO:0031646	positive regulation of neurological system process	0.24123
heart rate	GOTERM_BP_FAT	GO:0050804	regulation of synaptic transmission	0.240449
heart rate	GOTERM_BP_FAT	GO:0051971	positive regulation of transmission of nerve impulse	0.232421
heart rate	GOTERM_BP_FAT	GO:0050806	positive regulation of synaptic transmission	0.200335
heart rate	GOTERM_BP_FAT	GO:0032230	positive regulation of synaptic transmission, GABAergic	0.190721
heart rate	GOTERM_BP_FAT	GO:0048167	regulation of synaptic plasticity	0.180297
heart rate	GOTERM_BP_FAT	GO:0010743	regulation of foam cell differentiation	0.400509
heart rate	GOTERM_BP_FAT	GO:0010885	regulation of cholesterol storage	0.272201
heart rate	GOTERM_BP_FAT	GO:0010883	regulation of lipid storage	0.252392
heart rate	GOTERM_BP_FAT	GO:0010745	negative regulation of foam cell differentiation	0.219178
heart rate	GOTERM_BP_FAT	GO:0010886	positive regulation of cholesterol storage	0.197677
heart rate	GOTERM_BP_FAT	GO:0010884	positive regulation of lipid storage	0.195036
heart rate	GOTERM_BP_FAT	GO:0010887	negative regulation of cholesterol storage	0.190601
heart rate	GOTERM_BP_FAT	GO:0010888	negative regulation of lipid storage	0.183758
heart rate	GOTERM_BP_FAT	GO:0050730	regulation of peptidyl-tyrosine phosphorylation	0.380016
heart rate	GOTERM_BP_FAT	GO:0050731	positive regulation of peptidyl-tyrosine phosphorylation	0.322217
heart rate	GOTERM_BP_FAT	GO:0046427	positive regulation of JAK-STAT cascade	0.284354
heart rate	GOTERM_BP_FAT	GO:0046425	regulation of JAK-STAT cascade	0.248286
heart rate	GOTERM_BP_FAT	GO:0042531	positive regulation of tyrosine phosphorylation of STAT protein	0.243309
heart rate	GOTERM_BP_FAT	GO:0042509	regulation of tyrosine phosphorylation of STAT protein	0.218753
heart rate	GOTERM_BP_FAT	GO:0042523	positive regulation of tyrosine phosphorylation of Stat5 protein	0.189889
heart rate	GOTERM_BP_FAT	GO:0042522	regulation of tyrosine phosphorylation of Stat5 protein	0.180019
heart rate	GOTERM_BP_FAT	GO:0042517	positive regulation of tyrosine phosphorylation of Stat3 protein	0.157533
heart rate	GOTERM_BP_FAT	GO:0042516	regulation of tyrosine phosphorylation of Stat3 protein	0.150023
heart rate	GOTERM_BP_FAT	GO:0010594	regulation of endothelial cell migration	0.269631
heart rate	GOTERM_BP_FAT	GO:0040013	negative regulation of locomotion	0.267961
heart rate	GOTERM_BP_FAT	GO:0051271	negative regulation of cell motion	0.251265
heart rate	GOTERM_BP_FAT	GO:0030336	negative regulation of cell migration	0.25106
heart rate	GOTERM_BP_FAT	GO:0043535	regulation of blood vessel endothelial cell migration	0.236485
heart rate	GOTERM_BP_FAT	GO:0010595	positive regulation of endothelial cell migration	0.23235
heart rate	GOTERM_BP_FAT	GO:0043537	negative regulation of blood vessel endothelial cell migration	0.213845
heart rate	GOTERM_BP_FAT	GO:0010596	negative regulation of endothelial cell migration	0.208429
heart rate	GOTERM_BP_FAT	GO:0043536	positive regulation of blood vessel endothelial cell migration	0.193401
heart rate	GOTERM_BP_FAT	GO:0060537	muscle tissue development	0.240792
heart rate	GOTERM_BP_FAT	GO:0007517	muscle organ development	0.237384
heart rate	GOTERM_BP_FAT	GO:0014706	striated muscle tissue development	0.229765
heart rate	GOTERM_BP_FAT	GO:0048738	cardiac muscle tissue development	0.22547
heart rate	GOTERM_BP_FAT	GO:0050865	regulation of cell activation	0.349165
heart rate	GOTERM_BP_FAT	GO:0002684	positive regulation of immune system process	0.297308
heart rate	GOTERM_BP_FAT	GO:0002694	regulation of leukocyte activation	0.290883
heart rate	GOTERM_BP_FAT	GO:0051249	regulation of lymphocyte activation	0.285521
heart rate	GOTERM_BP_FAT	GO:0070663	regulation of leukocyte proliferation	0.279275
heart rate	GOTERM_BP_FAT	GO:0032944	regulation of mononuclear cell proliferation	0.279275
heart rate	GOTERM_BP_FAT	GO:0050867	positive regulation of cell activation	0.277784
heart rate	GOTERM_BP_FAT	GO:0050670	regulation of lymphocyte proliferation	0.2693
heart rate	GOTERM_BP_FAT	GO:0002696	positive regulation of leukocyte activation	0.253839
heart rate	GOTERM_BP_FAT	GO:0050866	negative regulation of cell activation	0.251657
heart rate	GOTERM_BP_FAT	GO:0050863	regulation of T cell activation	0.248674
heart rate	GOTERM_BP_FAT	GO:0032946	positive regulation of mononuclear cell proliferation	0.237091
heart rate	GOTERM_BP_FAT	GO:0070665	positive regulation of leukocyte proliferation	0.237091
heart rate	GOTERM_BP_FAT	GO:0051251	positive regulation of lymphocyte activation	0.236267
heart rate	GOTERM_BP_FAT	GO:0050671	positive regulation of lymphocyte proliferation	0.227005
heart rate	GOTERM_BP_FAT	GO:0042129	regulation of T cell proliferation	0.226092
heart rate	GOTERM_BP_FAT	GO:0002683	negative regulation of immune system process	0.225666
heart rate	GOTERM_BP_FAT	GO:0050864	regulation of B cell activation	0.222632
heart rate	GOTERM_BP_FAT	GO:0002695	negative regulation of leukocyte activation	0.212205
heart rate	GOTERM_BP_FAT	GO:0030888	regulation of B cell proliferation	0.207967
heart rate	GOTERM_BP_FAT	GO:0051250	negative regulation of lymphocyte activation	0.206125
heart rate	GOTERM_BP_FAT	GO:0002822	regulation of adaptive immune response based on somatic recombination of immune receptors built from immunoglobulin superfamily domains	0.204579
heart rate	GOTERM_BP_FAT	GO:0002819	regulation of adaptive immune response	0.203074
heart rate	GOTERM_BP_FAT	GO:0032945	negative regulation of mononuclear cell proliferation	0.198905
heart rate	GOTERM_BP_FAT	GO:0070664	negative regulation of leukocyte proliferation	0.198905
heart rate	GOTERM_BP_FAT	GO:0050672	negative regulation of lymphocyte proliferation	0.198905
heart rate	GOTERM_BP_FAT	GO:0002706	regulation of lymphocyte mediated immunity	0.195667
heart rate	GOTERM_BP_FAT	GO:0050868	negative regulation of T cell activation	0.192558
heart rate	GOTERM_BP_FAT	GO:0050870	positive regulation of T cell activation	0.187758
heart rate	GOTERM_BP_FAT	GO:0042102	positive regulation of T cell proliferation	0.186427
heart rate	GOTERM_BP_FAT	GO:0050871	positive regulation of B cell activation	0.18508
heart rate	GOTERM_BP_FAT	GO:0042130	negative regulation of T cell proliferation	0.184121
heart rate	GOTERM_BP_FAT	GO:0050869	negative regulation of B cell activation	0.177288
heart rate	GOTERM_BP_FAT	GO:0030889	negative regulation of B cell proliferation	0.175659
heart rate	GOTERM_BP_FAT	GO:0010817	regulation of hormone levels	0.33096
heart rate	GOTERM_BP_FAT	GO:0046903	secretion	0.261498
heart rate	GOTERM_BP_FAT	GO:0009914	hormone transport	0.236922
heart rate	GOTERM_BP_FAT	GO:0002790	peptide secretion	0.228799
heart rate	GOTERM_BP_FAT	GO:0030072	peptide hormone secretion	0.22015
heart rate	GOTERM_BP_FAT	GO:0046879	hormone secretion	0.220038
heart rate	GOTERM_BP_FAT	GO:0015833	peptide transport	0.203927
heart rate	GOTERM_BP_FAT	GO:0003001	generation of a signal involved in cell-cell signaling	0.201863
heart rate	GOTERM_BP_FAT	GO:0032940	secretion by cell	0.183883
heart rate	GOTERM_BP_FAT	GO:0030073	insulin secretion	0.170357
heart rate	GOTERM_BP_FAT	GO:0009746	response to hexose stimulus	0.225023
heart rate	GOTERM_BP_FAT	GO:0034284	response to monosaccharide stimulus	0.225023
heart rate	GOTERM_BP_FAT	GO:0009749	response to glucose stimulus	0.216619
heart rate	GOTERM_BP_FAT	GO:0009743	response to carbohydrate stimulus	0.212684
heart rate	GOTERM_BP_FAT	GO:0008203	cholesterol metabolic process	0.281895
heart rate	SP_PIR_KEYWORDS	cholesterol metabolism		0.226108
heart rate	SP_PIR_KEYWORDS	lipid metabolism		0.218881
heart rate	SP_PIR_KEYWORDS	steroid metabolism		0.196202
heart rate	OMIM_DISEASE	Common variants at 30 loci contribute to polygenic dyslipidemia		0.172553
heart rate	GOTERM_BP_FAT	GO:0046888	negative regulation of hormone secretion	0.273395
heart rate	GOTERM_BP_FAT	GO:0050796	regulation of insulin secretion	0.255483
heart rate	GOTERM_BP_FAT	GO:0002792	negative regulation of peptide secretion	0.171955
heart rate	GOTERM_BP_FAT	GO:0046676	negative regulation of insulin secretion	0.171955
heart rate	GOTERM_CC_FAT	GO:0030424	axon	0.257685
heart rate	GOTERM_CC_FAT	GO:0033267	axon part	0.223227
heart rate	GOTERM_CC_FAT	GO:0043679	nerve terminal	0.20783
heart rate	GOTERM_CC_FAT	GO:0043195	terminal button	0.181899
heart rate	GOTERM_BP_FAT	GO:0009891	positive regulation of biosynthetic process	0.455591
heart rate	GOTERM_BP_FAT	GO:0031328	positive regulation of cellular biosynthetic process	0.433784
heart rate	GOTERM_BP_FAT	GO:0010604	positive regulation of macromolecule metabolic process	0.403063
heart rate	GOTERM_BP_FAT	GO:0051173	positive regulation of nitrogen compound metabolic process	0.3794
heart rate	GOTERM_BP_FAT	GO:0010557	positive regulation of macromolecule biosynthetic process	0.328849
heart rate	GOTERM_BP_FAT	GO:0045935	positive regulation of nucleobase, nucleoside, nucleotide and nucleic acid metabolic process	0.316836
heart rate	GOTERM_BP_FAT	GO:0010628	positive regulation of gene expression	0.276411
heart rate	GOTERM_BP_FAT	GO:0045941	positive regulation of transcription	0.257566
heart rate	GOTERM_BP_FAT	GO:0045944	positive regulation of transcription from RNA polymerase II promoter	0.257023
heart rate	GOTERM_BP_FAT	GO:0045893	positive regulation of transcription, DNA-dependent	0.250355
heart rate	GOTERM_BP_FAT	GO:0051254	positive regulation of RNA metabolic process	0.248002
heart rate	GOTERM_BP_FAT	GO:0006357	regulation of transcription from RNA polymerase II promoter	0.228887
heart rate	GOTERM_MF_FAT	GO:0008134	transcription factor binding	0.17447
heart rate	GOTERM_MF_FAT	GO:0016563	transcription activator activity	0.153532
heart rate	SP_PIR_KEYWORDS	activator		0.145712
heart rate	GOTERM_MF_FAT	GO:0043565	sequence-specific DNA binding	0.145086
heart rate	GOTERM_BP_FAT	GO:0006355	regulation of transcription, DNA-dependent	0.126698
heart rate	GOTERM_MF_FAT	GO:0003700	transcription factor activity	0.125739
heart rate	GOTERM_BP_FAT	GO:0051252	regulation of RNA metabolic process	0.125508
heart rate	GOTERM_MF_FAT	GO:0030528	transcription regulator activity	0.124761
heart rate	GOTERM_BP_FAT	GO:0045449	regulation of transcription	0.123149
heart rate	SP_PIR_KEYWORDS	transcription regulation		0.123017
heart rate	SP_PIR_KEYWORDS	dna-binding		0.122928
heart rate	SP_PIR_KEYWORDS	Transcription		0.122816
heart rate	SP_PIR_KEYWORDS	nucleus		0.122714
heart rate	GOTERM_MF_FAT	GO:0003677	DNA binding	0.122714
heart rate	GOTERM_BP_FAT	GO:0006350	transcription	0.122714
heart rate	SP_PIR_KEYWORDS	ubl conjugation		0.259295
heart rate	SP_PIR_KEYWORDS	isopeptide bond		0.191762
heart rate	UP_SEQ_FEATURE	cross-link:Glycyl lysine isopeptide (Lys-Gly) (interchain with G-Cter in ubiquitin)		0.181313
heart rate	GOTERM_BP_FAT	GO:0031099	regeneration	0.260292
heart rate	GOTERM_BP_FAT	GO:0048589	developmental growth	0.189499
heart rate	GOTERM_BP_FAT	GO:0042246	tissue regeneration	0.174509
heart rate	GOTERM_BP_FAT	GO:0051052	regulation of DNA metabolic process	0.221184
heart rate	GOTERM_BP_FAT	GO:0006275	regulation of DNA replication	0.213733
heart rate	GOTERM_BP_FAT	GO:0051054	positive regulation of DNA metabolic process	0.201468
heart rate	GOTERM_BP_FAT	GO:0045740	positive regulation of DNA replication	0.195607
heart rate	GOTERM_BP_FAT	GO:0045637	regulation of myeloid cell differentiation	0.282112
heart rate	GOTERM_BP_FAT	GO:0045639	positive regulation of myeloid cell differentiation	0.271643
heart rate	GOTERM_BP_FAT	GO:0002761	regulation of myeloid leukocyte differentiation	0.259927
heart rate	GOTERM_BP_FAT	GO:0002763	positive regulation of myeloid leukocyte differentiation	0.228022
heart rate	GOTERM_BP_FAT	GO:0045670	regulation of osteoclast differentiation	0.211489
heart rate	GOTERM_BP_FAT	GO:0045651	positive regulation of macrophage differentiation	0.171062
heart rate	GOTERM_BP_FAT	GO:0045649	regulation of macrophage differentiation	0.167477
heart rate	GOTERM_BP_FAT	GO:0045671	negative regulation of osteoclast differentiation	0.157765
heart rate	GOTERM_BP_FAT	GO:0002762	negative regulation of myeloid leukocyte differentiation	0.152257
heart rate	GOTERM_BP_FAT	GO:0045638	negative regulation of myeloid cell differentiation	0.144371
heart rate	GOTERM_BP_FAT	GO:0001890	placenta development	0.224795
heart rate	GOTERM_BP_FAT	GO:0046697	decidualization	0.192499
heart rate	GOTERM_BP_FAT	GO:0001893	maternal placenta development	0.184368
heart rate	SP_PIR_KEYWORDS	mitogen		0.229312
heart rate	GOTERM_BP_FAT	GO:0051781	positive regulation of cell division	0.192858
heart rate	GOTERM_BP_FAT	GO:0051302	regulation of cell division	0.178807
heart rate	UP_SEQ_FEATURE	zinc finger region:NR C4-type		0.229191
heart rate	UP_SEQ_FEATURE	DNA-binding region:Nuclear receptor		0.229191
heart rate	INTERPRO	IPR001628:Zinc finger, nuclear hormone receptor-type		0.217187
heart rate	SMART	SM00399:ZnF_C4		0.215274
heart rate	INTERPRO	IPR000536:Nuclear hormone receptor, ligand-binding, core		0.213192
heart rate	INTERPRO	IPR008946:Nuclear hormone receptor, ligand-binding		0.213192
heart rate	SMART	SM00430:HOLI		0.211293
heart rate	INTERPRO	IPR013088:Zinc finger, NHR/GATA-type		0.207619
heart rate	UP_SEQ_FEATURE	region of interest:Ligand-binding		0.203465
heart rate	INTERPRO	IPR001723:Steroid hormone receptor		0.202174
heart rate	GOTERM_MF_FAT	GO:0003707	steroid hormone receptor activity	0.196189
heart rate	GOTERM_MF_FAT	GO:0004879	ligand-dependent nuclear receptor activity	0.181865
heart rate	INTERPRO	IPR000324:Vitamin D receptor		0.163883
heart rate	UP_SEQ_FEATURE	region of interest:Modulating		0.149329
heart rate	SP_PIR_KEYWORDS	zinc finger		0.147792
heart rate	GOTERM_BP_FAT	GO:0034103	regulation of tissue remodeling	0.279689
heart rate	GOTERM_BP_FAT	GO:0045124	regulation of bone resorption	0.239854
heart rate	GOTERM_BP_FAT	GO:0046850	regulation of bone remodeling	0.239854
heart rate	GOTERM_BP_FAT	GO:0034104	negative regulation of tissue remodeling	0.206563
heart rate	GOTERM_BP_FAT	GO:0032845	negative regulation of homeostatic process	0.178447
heart rate	GOTERM_BP_FAT	GO:0046851	negative regulation of bone remodeling	0.175555
heart rate	GOTERM_BP_FAT	GO:0045779	negative regulation of bone resorption	0.175555
heart rate	GOTERM_BP_FAT	GO:0034105	positive regulation of tissue remodeling	0.160646
heart rate	GOTERM_BP_FAT	GO:0046852	positive regulation of bone remodeling	0.150674
heart rate	GOTERM_BP_FAT	GO:0045780	positive regulation of bone resorption	0.150674
heart rate	GOTERM_BP_FAT	GO:0030001	metal ion transport	0.25037
heart rate	GOTERM_BP_FAT	GO:0006816	calcium ion transport	0.183553
heart rate	GOTERM_BP_FAT	GO:0015674	di-, tri-valent inorganic cation transport	0.171643
heart rate	SP_PIR_KEYWORDS	calcium transport		0.161986
heart rate	GOTERM_BP_FAT	GO:0048511	rhythmic process	0.272393
heart rate	GOTERM_BP_FAT	GO:0042698	ovulation cycle	0.242582
heart rate	GOTERM_BP_FAT	GO:0022602	ovulation cycle process	0.227997
heart rate	GOTERM_BP_FAT	GO:0008585	female gonad development	0.212355
heart rate	GOTERM_BP_FAT	GO:0046660	female sex differentiation	0.204003
heart rate	GOTERM_BP_FAT	GO:0046545	development of primary female sexual characteristics	0.204003
heart rate	GOTERM_BP_FAT	GO:0030728	ovulation	0.201776
heart rate	GOTERM_BP_FAT	GO:0003006	reproductive developmental process	0.19609
heart rate	GOTERM_BP_FAT	GO:0001542	ovulation from ovarian follicle	0.192294
heart rate	GOTERM_BP_FAT	GO:0048608	reproductive structure development	0.190246
heart rate	GOTERM_BP_FAT	GO:0008406	gonad development	0.187783
heart rate	GOTERM_BP_FAT	GO:0007292	female gamete generation	0.178959
heart rate	GOTERM_BP_FAT	GO:0045137	development of primary sexual characteristics	0.173984
heart rate	GOTERM_BP_FAT	GO:0007548	sex differentiation	0.162987
heart rate	GOTERM_BP_FAT	GO:0001541	ovarian follicle development	0.15191
heart rate	GOTERM_BP_FAT	GO:0007276	gamete generation	0.129999
heart rate	GOTERM_BP_FAT	GO:0019953	sexual reproduction	0.129834
heart rate	GOTERM_BP_FAT	GO:0042326	negative regulation of phosphorylation	0.212288
heart rate	GOTERM_BP_FAT	GO:0045936	negative regulation of phosphate metabolic process	0.205809
heart rate	GOTERM_BP_FAT	GO:0010563	negative regulation of phosphorus metabolic process	0.205809
heart rate	GOTERM_BP_FAT	GO:0001933	negative regulation of protein amino acid phosphorylation	0.203101
heart rate	GOTERM_BP_FAT	GO:0051248	negative regulation of protein metabolic process	0.175723
heart rate	GOTERM_BP_FAT	GO:0032269	negative regulation of cellular protein metabolic process	0.174098
heart rate	GOTERM_BP_FAT	GO:0031400	negative regulation of protein modification process	0.151606
heart rate	GOTERM_BP_FAT	GO:0035295	tube development	0.242256
heart rate	GOTERM_BP_FAT	GO:0030324	lung development	0.17424
heart rate	GOTERM_BP_FAT	GO:0030323	respiratory tube development	0.171358
heart rate	GOTERM_BP_FAT	GO:0060541	respiratory system development	0.165989
heart rate	GOTERM_BP_FAT	GO:0008202	steroid metabolic process	0.32699
heart rate	GOTERM_BP_FAT	GO:0034367	macromolecular complex remodeling	0.314717
heart rate	GOTERM_BP_FAT	GO:0034368	protein-lipid complex remodeling	0.314717
heart rate	GOTERM_BP_FAT	GO:0034369	plasma lipoprotein particle remodeling	0.314717
heart rate	GOTERM_BP_FAT	GO:0034381	lipoprotein particle clearance	0.300131
heart rate	GOTERM_BP_FAT	GO:0055088	lipid homeostasis	0.28072
heart rate	GOTERM_BP_FAT	GO:0032368	regulation of lipid transport	0.274801
heart rate	GOTERM_BP_FAT	GO:0008203	cholesterol metabolic process	0.264004
heart rate	GOTERM_BP_FAT	GO:0055092	sterol homeostasis	0.260221
heart rate	GOTERM_BP_FAT	GO:0042632	cholesterol homeostasis	0.260221
heart rate	GOTERM_BP_FAT	GO:0016125	sterol metabolic process	0.259363
heart rate	GOTERM_BP_FAT	GO:0043691	reverse cholesterol transport	0.250841
heart rate	GOTERM_BP_FAT	GO:0032371	regulation of sterol transport	0.247456
heart rate	GOTERM_BP_FAT	GO:0032374	regulation of cholesterol transport	0.247456
heart rate	GOTERM_BP_FAT	GO:0018904	organic ether metabolic process	0.245934
heart rate	GOTERM_BP_FAT	GO:0010876	lipid localization	0.240654
heart rate	GOTERM_BP_FAT	GO:0034374	low-density lipoprotein particle remodeling	0.236816
heart rate	GOTERM_BP_FAT	GO:0006869	lipid transport	0.236707
heart rate	GOTERM_MF_FAT	GO:0005496	steroid binding	0.233
heart rate	GOTERM_BP_FAT	GO:0030301	cholesterol transport	0.231989
heart rate	GOTERM_BP_FAT	GO:0015918	sterol transport	0.231989
heart rate	GOTERM_BP_FAT	GO:0006641	triglyceride metabolic process	0.229707
heart rate	GOTERM_BP_FAT	GO:0006639	acylglycerol metabolic process	0.228421
heart rate	GOTERM_BP_FAT	GO:0046486	glycerolipid metabolic process	0.226132
heart rate	GOTERM_BP_FAT	GO:0006638	neutral lipid metabolic process	0.226054
heart rate	GOTERM_CC_FAT	GO:0034358	plasma lipoprotein particle	0.223981
heart rate	GOTERM_CC_FAT	GO:0032994	protein-lipid complex	0.223981
heart rate	GOTERM_BP_FAT	GO:0006662	glycerol ether metabolic process	0.223756
heart rate	GOTERM_BP_FAT	GO:0034375	high-density lipoprotein particle remodeling	0.210882
heart rate	GOTERM_MF_FAT	GO:0017127	cholesterol transporter activity	0.189603
heart rate	GOTERM_BP_FAT	GO:0034370	triglyceride-rich lipoprotein particle remodeling	0.186318
heart rate	GOTERM_BP_FAT	GO:0042157	lipoprotein metabolic process	0.186181
heart rate	GOTERM_BP_FAT	GO:0015914	phospholipid transport	0.185703
heart rate	SP_PIR_KEYWORDS	vldl		0.182993
heart rate	SP_PIR_KEYWORDS	lipid binding		0.180667
heart rate	GOTERM_BP_FAT	GO:0033700	phospholipid efflux	0.180509
heart rate	GOTERM_MF_FAT	GO:0015248	sterol transporter activity	0.180498
heart rate	GOTERM_CC_FAT	GO:0034364	high-density lipoprotein particle	0.178356
heart rate	GOTERM_CC_FAT	GO:0034361	very-low-density lipoprotein particle	0.177333
heart rate	GOTERM_CC_FAT	GO:0034385	triglyceride-rich lipoprotein particle	0.177333
heart rate	GOTERM_BP_FAT	GO:0034372	very-low-density lipoprotein particle remodeling	0.177238
heart rate	GOTERM_BP_FAT	GO:0032369	negative regulation of lipid transport	0.177056
heart rate	GOTERM_MF_FAT	GO:0070325	lipoprotein receptor binding	0.176655
heart rate	GOTERM_CC_FAT	GO:0042627	chylomicron	0.171767
heart rate	GOTERM_BP_FAT	GO:0070328	triglyceride homeostasis	0.170978
heart rate	GOTERM_BP_FAT	GO:0010872	regulation of cholesterol esterification	0.170978
heart rate	GOTERM_MF_FAT	GO:0015485	cholesterol binding	0.169997
heart rate	SP_PIR_KEYWORDS	chylomicron		0.167527
heart rate	GOTERM_BP_FAT	GO:0033344	cholesterol efflux	0.164768
heart rate	GOTERM_MF_FAT	GO:0032934	sterol binding	0.164383
heart rate	GOTERM_BP_FAT	GO:0034384	high-density lipoprotein particle clearance	0.161438
heart rate	GOTERM_MF_FAT	GO:0005319	lipid transporter activity	0.159921
heart rate	OMIM_DISEASE	Newly identified loci that influence lipid concentrations and risk of coronary artery disease		0.15879
heart rate	GOTERM_BP_FAT	GO:0032370	positive regulation of lipid transport	0.157854
heart rate	OMIM_DISEASE	Six new loci associated with blood low-density lipoprotein cholesterol, high-density lipoprotein cholesterol or triglycerides in humans		0.157548
heart rate	GOTERM_BP_FAT	GO:0010874	regulation of cholesterol efflux	0.15607
heart rate	GOTERM_BP_FAT	GO:0032376	positive regulation of cholesterol transport	0.15607
heart rate	GOTERM_BP_FAT	GO:0032373	positive regulation of sterol transport	0.15607
heart rate	GOTERM_BP_FAT	GO:0010873	positive regulation of cholesterol esterification	0.15607
heart rate	SP_PIR_KEYWORDS	atherosclerosis		0.155882
heart rate	OMIM_DISEASE	Genome-wide association analysis of metabolic traits in a birth cohort from a founder population		0.155048
heart rate	OMIM_DISEASE	Common variants at 30 loci contribute to polygenic dyslipidemia		0.154662
heart rate	GOTERM_BP_FAT	GO:0065005	protein-lipid complex assembly	0.154595
heart rate	GOTERM_BP_FAT	GO:0034377	plasma lipoprotein particle assembly	0.154595
heart rate	PIR_SUPERFAMILY	PIRSF002367:apolipoprotein A-I		0.153321
heart rate	SP_PIR_KEYWORDS	intestine		0.152788
heart rate	SP_PIR_KEYWORDS	lipid transport		0.152241
heart rate	GOTERM_CC_FAT	GO:0034363	intermediate-density lipoprotein particle	0.152215
heart rate	GOTERM_CC_FAT	GO:0034366	spherical high-density lipoprotein particle	0.152076
heart rate	GOTERM_BP_FAT	GO:0032488	Cdc42 protein signal transduction	0.15196
heart rate	SP_PIR_KEYWORDS	hdl		0.14975
heart rate	OMIM_DISEASE	Loci influencing lipid levels and coronary heart disease risk in 16 European population cohorts		0.149005
heart rate	GOTERM_BP_FAT	GO:0046464	acylglycerol catabolic process	0.148141
heart rate	GOTERM_BP_FAT	GO:0046461	neutral lipid catabolic process	0.148141
heart rate	GOTERM_BP_FAT	GO:0044269	glycerol ether catabolic process	0.148141
heart rate	GOTERM_BP_FAT	GO:0010901	regulation of very-low-density lipoprotein particle remodeling	0.146098
heart rate	GOTERM_BP_FAT	GO:0034380	high-density lipoprotein particle assembly	0.146098
heart rate	GOTERM_BP_FAT	GO:0034382	chylomicron remnant clearance	0.146098
heart rate	GOTERM_BP_FAT	GO:0055091	phospholipid homeostasis	0.146098
heart rate	GOTERM_BP_FAT	GO:0010875	positive regulation of cholesterol efflux	0.141751
heart rate	GOTERM_BP_FAT	GO:0046503	glycerolipid catabolic process	0.140001
heart rate	GOTERM_BP_FAT	GO:0032375	negative regulation of cholesterol transport	0.138311
heart rate	GOTERM_BP_FAT	GO:0032372	negative regulation of sterol transport	0.138311
heart rate	GOTERM_CC_FAT	GO:0034362	low-density lipoprotein particle	0.138189
heart rate	GOTERM_MF_FAT	GO:0008035	high-density lipoprotein binding	0.138138
heart rate	GOTERM_BP_FAT	GO:0010903	negative regulation of very-low-density lipoprotein particle remodeling	0.135833
heart rate	GOTERM_MF_FAT	GO:0070653	high-density lipoprotein receptor binding	0.135712
heart rate	GOTERM_BP_FAT	GO:0019433	triglyceride catabolic process	0.135479
heart rate	SP_PIR_KEYWORDS	hyperlipidemia		0.135404
heart rate	GOTERM_MF_FAT	GO:0060228	phosphatidylcholine-sterol O-acyltransferase activator activity	0.128181
heart rate	GOTERM_MF_FAT	GO:0055102	lipase inhibitor activity	0.123588
heart rate	GOTERM_BP_FAT	GO:0007266	Rho protein signal transduction	0.120967
heart rate	GOTERM_MF_FAT	GO:0031420	alkali metal ion binding	0.215988
heart rate	GOTERM_BP_FAT	GO:0015672	monovalent inorganic cation transport	0.205347
heart rate	SP_PIR_KEYWORDS	sodium channel		0.198433
heart rate	GOTERM_MF_FAT	GO:0005272	sodium channel activity	0.185841
heart rate	SP_PIR_KEYWORDS	Sodium transport		0.184908
heart rate	SP_PIR_KEYWORDS	Sodium		0.184908
heart rate	GOTERM_MF_FAT	GO:0031402	sodium ion binding	0.156054
heart rate	GOTERM_BP_FAT	GO:0006814	sodium ion transport	0.147976
heart rate	GOTERM_BP_FAT	GO:0001776	leukocyte homeostasis	0.201273
heart rate	GOTERM_BP_FAT	GO:0033135	regulation of peptidyl-serine phosphorylation	0.19514
heart rate	GOTERM_BP_FAT	GO:0002262	myeloid cell homeostasis	0.143784
heart rate	GOTERM_BP_FAT	GO:0007260	tyrosine phosphorylation of STAT protein	0.179853
heart rate	GOTERM_BP_FAT	GO:0018108	peptidyl-tyrosine phosphorylation	0.178908
heart rate	GOTERM_BP_FAT	GO:0018212	peptidyl-tyrosine modification	0.175458
heart rate	GOTERM_BP_FAT	GO:0045787	positive regulation of cell cycle	0.2295
heart rate	GOTERM_BP_FAT	GO:0010638	positive regulation of organelle organization	0.194883
heart rate	GOTERM_BP_FAT	GO:0051785	positive regulation of nuclear division	0.185307
heart rate	GOTERM_BP_FAT	GO:0045840	positive regulation of mitosis	0.185307
heart rate	GOTERM_BP_FAT	GO:0010564	regulation of cell cycle process	0.161021
heart rate	GOTERM_BP_FAT	GO:0051726	regulation of cell cycle	0.159971
heart rate	GOTERM_BP_FAT	GO:0007346	regulation of mitotic cell cycle	0.15957
heart rate	GOTERM_BP_FAT	GO:0051783	regulation of nuclear division	0.152648
heart rate	GOTERM_BP_FAT	GO:0007088	regulation of mitosis	0.152648
heart rate	GOTERM_BP_FAT	GO:0043271	negative regulation of ion transport	0.208068
heart rate	GOTERM_BP_FAT	GO:0043266	regulation of potassium ion transport	0.173588
heart rate	GOTERM_BP_FAT	GO:0043267	negative regulation of potassium ion transport	0.145039
heart rate	GOTERM_BP_FAT	GO:0046889	positive regulation of lipid biosynthetic process	0.196811
heart rate	GOTERM_BP_FAT	GO:0045940	positive regulation of steroid metabolic process	0.190766
heart rate	GOTERM_BP_FAT	GO:0010893	positive regulation of steroid biosynthetic process	0.12958
heart rate	SP_PIR_KEYWORDS	copper		0.179861
heart rate	GOTERM_MF_FAT	GO:0005507	copper ion binding	0.171003
heart rate	UP_SEQ_FEATURE	metal ion-binding site:Copper		0.162788
heart rate	GOTERM_BP_FAT	GO:0030810	positive regulation of nucleotide biosynthetic process	0.203012
heart rate	GOTERM_BP_FAT	GO:0030804	positive regulation of cyclic nucleotide biosynthetic process	0.203012
heart rate	GOTERM_BP_FAT	GO:0030801	positive regulation of cyclic nucleotide metabolic process	0.203012
heart rate	GOTERM_BP_FAT	GO:0045981	positive regulation of nucleotide metabolic process	0.203012
heart rate	GOTERM_BP_FAT	GO:0030816	positive regulation of cAMP metabolic process	0.164443
heart rate	GOTERM_BP_FAT	GO:0030819	positive regulation of cAMP biosynthetic process	0.164443
heart rate	GOTERM_BP_FAT	GO:0030826	regulation of cGMP biosynthetic process	0.137016
heart rate	GOTERM_BP_FAT	GO:0030825	positive regulation of cGMP metabolic process	0.134972
heart rate	GOTERM_BP_FAT	GO:0030828	positive regulation of cGMP biosynthetic process	0.134972
heart rate	GOTERM_BP_FAT	GO:0030823	regulation of cGMP metabolic process	0.133932
heart rate	GOTERM_BP_FAT	GO:0043271	negative regulation of ion transport	0.202163
heart rate	GOTERM_BP_FAT	GO:0032845	negative regulation of homeostatic process	0.161045
heart rate	GOTERM_BP_FAT	GO:0051926	negative regulation of calcium ion transport	0.158449
heart rate	GOTERM_BP_FAT	GO:0010523	negative regulation of calcium ion transport into cytosol	0.139134
heart rate	GOTERM_BP_FAT	GO:0009314	response to radiation	0.182816
heart rate	GOTERM_BP_FAT	GO:0009411	response to UV	0.14929
heart rate	GOTERM_BP_FAT	GO:0009416	response to light stimulus	0.147316
heart rate	SP_PIR_KEYWORDS	cell adhesion		0.173964
heart rate	GOTERM_BP_FAT	GO:0007155	cell adhesion	0.171883
heart rate	GOTERM_BP_FAT	GO:0022610	biological adhesion	0.171504
heart rate	GOTERM_BP_FAT	GO:0016337	cell-cell adhesion	0.112881
heart rate	GOTERM_BP_FAT	GO:0045927	positive regulation of growth	0.188896
heart rate	GOTERM_BP_FAT	GO:0045793	positive regulation of cell size	0.142804
heart rate	GOTERM_BP_FAT	GO:0030307	positive regulation of cell growth	0.140941
heart rate	GOTERM_CC_FAT	GO:0016529	sarcoplasmic reticulum	0.181459
heart rate	GOTERM_CC_FAT	GO:0016528	sarcoplasm	0.177083
heart rate	SP_PIR_KEYWORDS	sarcoplasmic reticulum		0.152525
heart rate	GOTERM_CC_FAT	GO:0033017	sarcoplasmic reticulum membrane	0.113547
heart rate	GOTERM_BP_FAT	GO:0016044	membrane organization	0.215007
heart rate	GOTERM_BP_FAT	GO:0010324	membrane invagination	0.15252
heart rate	GOTERM_BP_FAT	GO:0006897	endocytosis	0.15252
heart rate	GOTERM_BP_FAT	GO:0006909	phagocytosis	0.150827
heart rate	GOTERM_BP_FAT	GO:0016192	vesicle-mediated transport	0.0983891
heart rate	KEGG_PATHWAY	hsa05215:Prostate cancer		0.178087
heart rate	KEGG_PATHWAY	hsa04012:ErbB signaling pathway		0.172919
heart rate	KEGG_PATHWAY	hsa05214:Glioma		0.15316
heart rate	KEGG_PATHWAY	hsa05213:Endometrial cancer		0.145872
heart rate	KEGG_PATHWAY	hsa05223:Non-small cell lung cancer		0.134514
heart rate	KEGG_PATHWAY	hsa05218:Melanoma		0.134145
heart rate	GOTERM_BP_FAT	GO:0003073	regulation of systemic arterial blood pressure	0.306323
heart rate	GOTERM_BP_FAT	GO:0003044	regulation of systemic arterial blood pressure mediated by a chemical signal	0.249698
heart rate	GOTERM_BP_FAT	GO:0050886	endocrine process	0.212193
heart rate	GOTERM_BP_FAT	GO:0001990	regulation of systemic arterial blood pressure by hormone	0.207343
heart rate	GOTERM_BP_FAT	GO:0001976	neurological system process involved in regulation of systemic arterial blood pressure	0.165837
heart rate	GOTERM_BP_FAT	GO:0002016	regulation of blood volume by renin-angiotensin	0.150497
heart rate	GOTERM_BP_FAT	GO:0003081	regulation of systemic arterial blood pressure by renin-angiotensin	0.137372
heart rate	GOTERM_BP_FAT	GO:0003071	renal system process involved in regulation of systemic arterial blood pressure	0.135588
heart rate	SP_PIR_KEYWORDS	blood pressure control		0.131617
heart rate	GOTERM_BP_FAT	GO:0001991	regulation of systemic arterial blood pressure by circulatory renin-angiotensin	0.131267
heart rate	GOTERM_BP_FAT	GO:0042756	drinking behavior	0.131267
heart rate	KEGG_PATHWAY	hsa04614:Renin-angiotensin system		0.128877
heart rate	OMIM_DISEASE	Renal tubular dysgenesis		0.119859
heart rate	GOTERM_BP_FAT	GO:0003072	renal control of peripheral vascular resistance involved in regulation of systemic arterial blood pressure	0.115352
heart rate	GOTERM_BP_FAT	GO:0002034	regulation of blood vessel size by renin-angiotensin	0.115352
heart rate	GOTERM_BP_FAT	GO:0002035	brain renin-angiotensin system	0.115352
heart rate	BIOCARTA	h_ace2Pathway:Angiotensin-converting enzyme 2 regulates heart function		0.113931
heart rate	GOTERM_BP_FAT	GO:0002002	regulation of angiotensin levels in blood	0.107815
heart rate	GOTERM_BP_FAT	GO:0060177	regulation of angiotensin metabolic process	0.107815
heart rate	SP_PIR_KEYWORDS	glycation		0.166468
heart rate	UP_SEQ_FEATURE	glycosylation site:N-linked (Glc) (glycation)		0.159837
heart rate	UP_SEQ_FEATURE	site:Not glycated		0.126601
heart rate	GOTERM_BP_FAT	GO:0051960	regulation of nervous system development	0.184376
heart rate	GOTERM_BP_FAT	GO:0060284	regulation of cell development	0.167065
heart rate	GOTERM_BP_FAT	GO:0050767	regulation of neurogenesis	0.136379
heart rate	GOTERM_BP_FAT	GO:0045664	regulation of neuron differentiation	0.115913
heart rate	GOTERM_BP_FAT	GO:0031645	negative regulation of neurological system process	0.176563
heart rate	GOTERM_BP_FAT	GO:0051970	negative regulation of transmission of nerve impulse	0.170319
heart rate	GOTERM_BP_FAT	GO:0051966	regulation of synaptic transmission, glutamatergic	0.157878
heart rate	GOTERM_BP_FAT	GO:0050805	negative regulation of synaptic transmission	0.125467
heart rate	GOTERM_BP_FAT	GO:0051967	negative regulation of synaptic transmission, glutamatergic	0.116452
heart rate	GOTERM_BP_FAT	GO:0035239	tube morphogenesis	0.164137
heart rate	GOTERM_BP_FAT	GO:0001763	morphogenesis of a branching structure	0.143092
heart rate	GOTERM_BP_FAT	GO:0048754	branching morphogenesis of a tube	0.135475
heart rate	GOTERM_BP_FAT	GO:0007260	tyrosine phosphorylation of STAT protein	0.162344
heart rate	GOTERM_BP_FAT	GO:0007259	JAK-STAT cascade	0.15069
heart rate	GOTERM_BP_FAT	GO:0007262	STAT protein nuclear translocation	0.128958
heart rate	GOTERM_BP_FAT	GO:0001101	response to acid	0.155473
heart rate	GOTERM_BP_FAT	GO:0010243	response to organic nitrogen	0.154595
heart rate	GOTERM_BP_FAT	GO:0014075	response to amine stimulus	0.148912
heart rate	GOTERM_BP_FAT	GO:0043200	response to amino acid stimulus	0.117853
heart rate	GOTERM_BP_FAT	GO:0052547	regulation of peptidase activity	0.154061
heart rate	GOTERM_BP_FAT	GO:0043281	regulation of caspase activity	0.153146
heart rate	GOTERM_BP_FAT	GO:0052548	regulation of endopeptidase activity	0.149704
heart rate	GOTERM_BP_FAT	GO:0006919	activation of caspase activity	0.146807
heart rate	GOTERM_BP_FAT	GO:0043280	positive regulation of caspase activity	0.140237
heart rate	GOTERM_BP_FAT	GO:0010952	positive regulation of peptidase activity	0.140237
heart rate	GOTERM_BP_FAT	GO:0008635	activation of caspase activity by cytochrome c	0.123193
heart rate	GOTERM_BP_FAT	GO:0009894	regulation of catabolic process	0.2199
heart rate	GOTERM_BP_FAT	GO:0009896	positive regulation of catabolic process	0.2167
heart rate	GOTERM_BP_FAT	GO:0031329	regulation of cellular catabolic process	0.214905
heart rate	GOTERM_BP_FAT	GO:0031331	positive regulation of cellular catabolic process	0.209539
heart rate	GOTERM_BP_FAT	GO:0050994	regulation of lipid catabolic process	0.19513
heart rate	GOTERM_BP_FAT	GO:0006109	regulation of carbohydrate metabolic process	0.172908
heart rate	GOTERM_BP_FAT	GO:0045913	positive regulation of carbohydrate metabolic process	0.166922
heart rate	GOTERM_BP_FAT	GO:0010676	positive regulation of cellular carbohydrate metabolic process	0.166922
heart rate	GOTERM_BP_FAT	GO:0010675	regulation of cellular carbohydrate metabolic process	0.1622
heart rate	GOTERM_BP_FAT	GO:0010827	regulation of glucose transport	0.157962
heart rate	GOTERM_BP_FAT	GO:0010906	regulation of glucose metabolic process	0.155841
heart rate	GOTERM_BP_FAT	GO:0010907	positive regulation of glucose metabolic process	0.154209
heart rate	GOTERM_BP_FAT	GO:0043255	regulation of carbohydrate biosynthetic process	0.148341
heart rate	GOTERM_BP_FAT	GO:0046324	regulation of glucose import	0.147451
heart rate	GOTERM_BP_FAT	GO:0045725	positive regulation of glycogen biosynthetic process	0.136039
heart rate	GOTERM_BP_FAT	GO:0046326	positive regulation of glucose import	0.132223
heart rate	GOTERM_BP_FAT	GO:0010828	positive regulation of glucose transport	0.132223
heart rate	GOTERM_BP_FAT	GO:0045821	positive regulation of glycolysis	0.130541
heart rate	GOTERM_BP_FAT	GO:0043467	regulation of generation of precursor metabolites and energy	0.129377
heart rate	GOTERM_MF_FAT	GO:0005159	insulin-like growth factor receptor binding	0.128783
heart rate	GOTERM_BP_FAT	GO:0006111	regulation of gluconeogenesis	0.126219
heart rate	GOTERM_BP_FAT	GO:0032885	regulation of polysaccharide biosynthetic process	0.12357
heart rate	GOTERM_BP_FAT	GO:0010962	regulation of glucan biosynthetic process	0.12357
heart rate	GOTERM_BP_FAT	GO:0005979	regulation of glycogen biosynthetic process	0.12357
heart rate	GOTERM_BP_FAT	GO:0032881	regulation of polysaccharide metabolic process	0.121217
heart rate	GOTERM_MF_FAT	GO:0043548	phosphoinositide 3-kinase binding	0.119302
heart rate	GOTERM_BP_FAT	GO:0006110	regulation of glycolysis	0.114473
heart rate	GOTERM_BP_FAT	GO:0008286	insulin receptor signaling pathway	0.110634
heart rate	GOTERM_BP_FAT	GO:0045721	negative regulation of gluconeogenesis	0.110305
heart rate	GOTERM_BP_FAT	GO:0043471	regulation of cellular carbohydrate catabolic process	0.107155
heart rate	GOTERM_BP_FAT	GO:0043470	regulation of carbohydrate catabolic process	0.107155
heart rate	GOTERM_MF_FAT	GO:0005158	insulin receptor binding	0.102437
heart rate	GOTERM_BP_FAT	GO:0045912	negative regulation of carbohydrate metabolic process	0.0953292
heart rate	GOTERM_BP_FAT	GO:0010677	negative regulation of cellular carbohydrate metabolic process	0.0953292
heart rate	GOTERM_BP_FAT	GO:0007243	protein kinase cascade	0.357785
heart rate	SP_PIR_KEYWORDS	ATP		0.292604
heart rate	SP_PIR_KEYWORDS	phosphotransferase		0.290655
heart rate	UP_SEQ_FEATURE	active site:Proton acceptor		0.226969
heart rate	GOTERM_BP_FAT	GO:0006468	protein amino acid phosphorylation	0.209008
heart rate	GOTERM_BP_FAT	GO:0016310	phosphorylation	0.196707
heart rate	SP_PIR_KEYWORDS	tyrosine-specific protein kinase		0.176735
heart rate	SP_PIR_KEYWORDS	kinase		0.168097
heart rate	SP_PIR_KEYWORDS	autophosphorylation		0.162166
heart rate	GOTERM_BP_FAT	GO:0006796	phosphate metabolic process	0.158636
heart rate	GOTERM_BP_FAT	GO:0006793	phosphorus metabolic process	0.158636
heart rate	SP_PIR_KEYWORDS	tyrosine-protein kinase		0.155025
heart rate	INTERPRO	IPR001245:Tyrosine protein kinase		0.154567
heart rate	SMART	SM00219:TyrKc		0.152387
heart rate	INTERPRO	IPR008266:Tyrosine protein kinase, active site		0.147801
heart rate	UP_SEQ_FEATURE	binding site:ATP		0.144655
heart rate	UP_SEQ_FEATURE	domain:Protein kinase		0.140532
heart rate	INTERPRO	IPR000719:Protein kinase, core		0.133765
heart rate	SP_PIR_KEYWORDS	nucleotide-binding		0.13164
heart rate	SP_PIR_KEYWORDS	atp-binding		0.130933
heart rate	INTERPRO	IPR017441:Protein kinase, ATP binding site		0.128102
heart rate	GOTERM_MF_FAT	GO:0004713	protein tyrosine kinase activity	0.123987
heart rate	GOTERM_MF_FAT	GO:0004672	protein kinase activity	0.121433
heart rate	GOTERM_MF_FAT	GO:0004714	transmembrane receptor protein tyrosine kinase activity	0.113557
heart rate	SP_PIR_KEYWORDS	transferase		0.109067
heart rate	GOTERM_MF_FAT	GO:0001883	purine nucleoside binding	0.108844
heart rate	GOTERM_MF_FAT	GO:0001882	nucleoside binding	0.107582
heart rate	GOTERM_MF_FAT	GO:0030554	adenyl nucleotide binding	0.105585
heart rate	UP_SEQ_FEATURE	nucleotide phosphate-binding region:ATP		0.104132
heart rate	INTERPRO	IPR002290:Serine/threonine protein kinase		0.0998482
heart rate	SP_PIR_KEYWORDS	serine/threonine-protein kinase		0.0986913
heart rate	SMART	SM00220:S_TKc		0.0983222
heart rate	GOTERM_MF_FAT	GO:0032559	adenyl ribonucleotide binding	0.0968598
heart rate	INTERPRO	IPR008271:Serine/threonine protein kinase, active site		0.0956218
heart rate	BIOCARTA	h_mapkPathway:MAPKinase Signaling Pathway		0.0948208
heart rate	INTERPRO	IPR017442:Serine/threonine protein kinase-related		0.0947302
heart rate	GOTERM_MF_FAT	GO:0005524	ATP binding	0.0886492
heart rate	GOTERM_MF_FAT	GO:0004674	protein serine/threonine kinase activity	0.0886446
heart rate	GOTERM_MF_FAT	GO:0017076	purine nucleotide binding	0.087388
heart rate	GOTERM_MF_FAT	GO:0032553	ribonucleotide binding	0.0837814
heart rate	GOTERM_MF_FAT	GO:0032555	purine ribonucleotide binding	0.0837814
heart rate	GOTERM_MF_FAT	GO:0000166	nucleotide binding	0.0826969
heart rate	GOTERM_MF_FAT	GO:0008227	amine receptor activity	0.178665
heart rate	GOTERM_MF_FAT	GO:0004993	serotonin receptor activity	0.157101
heart rate	SP_PIR_KEYWORDS	neurotransmitter receptor		0.139272
heart rate	GOTERM_MF_FAT	GO:0051378	serotonin binding	0.137901
heart rate	INTERPRO	IPR002231:5-Hydroxytryptamine receptor		0.12501
heart rate	PIR_SUPERFAMILY	PIRSF005474:5-hydroxytryptamine receptor 1		0.096769
heart rate	GOTERM_BP_FAT	GO:0002902	regulation of B cell apoptosis	0.191218
heart rate	GOTERM_BP_FAT	GO:0070228	regulation of lymphocyte apoptosis	0.161696
heart rate	GOTERM_BP_FAT	GO:0002903	negative regulation of B cell apoptosis	0.12364
heart rate	GOTERM_BP_FAT	GO:0002904	positive regulation of B cell apoptosis	0.12364
heart rate	GOTERM_BP_FAT	GO:0070230	positive regulation of lymphocyte apoptosis	0.117779
heart rate	GOTERM_BP_FAT	GO:0070229	negative regulation of lymphocyte apoptosis	0.109992
heart rate	GOTERM_BP_FAT	GO:0031668	cellular response to extracellular stimulus	0.17033
heart rate	GOTERM_BP_FAT	GO:0031669	cellular response to nutrient levels	0.137039
heart rate	GOTERM_BP_FAT	GO:0009267	cellular response to starvation	0.123249
heart rate	GOTERM_BP_FAT	GO:0042594	response to starvation	0.119895
heart rate	GOTERM_BP_FAT	GO:0003014	renal system process	0.218379
heart rate	GOTERM_BP_FAT	GO:0003091	renal water homeostasis	0.132684
heart rate	GOTERM_BP_FAT	GO:0030104	water homeostasis	0.129378
heart rate	GOTERM_BP_FAT	GO:0050891	multicellular organismal water homeostasis	0.12897
heart rate	GOTERM_BP_FAT	GO:0030147	natriuresis	0.127186
heart rate	GOTERM_BP_FAT	GO:0043114	regulation of vascular permeability	0.127186
heart rate	GOTERM_BP_FAT	GO:0030146	diuresis	0.122864
heart rate	GOTERM_BP_FAT	GO:0007589	body fluid secretion	0.109373
heart rate	UP_SEQ_FEATURE	site:Reactive bond		0.153329
heart rate	GOTERM_MF_FAT	GO:0004857	enzyme inhibitor activity	0.14674
heart rate	GOTERM_MF_FAT	GO:0030414	peptidase inhibitor activity	0.142383
heart rate	INTERPRO	IPR000215:Protease inhibitor I4, serpin		0.141917
heart rate	GOTERM_MF_FAT	GO:0004866	endopeptidase inhibitor activity	0.141598
heart rate	SP_PIR_KEYWORDS	serine proteinase inhibitor		0.141458
heart rate	SMART	SM00093:SERPIN		0.140523
heart rate	SP_PIR_KEYWORDS	Serine protease inhibitor		0.134728
heart rate	SP_PIR_KEYWORDS	protease inhibitor		0.130667
heart rate	PIR_SUPERFAMILY	PIRSF001630:serpin		0.117149
heart rate	GOTERM_MF_FAT	GO:0004867	serine-type endopeptidase inhibitor activity	0.113445
heart rate	GOTERM_BP_FAT	GO:0010551	regulation of specific transcription from RNA polymerase II promoter	0.167847
heart rate	GOTERM_BP_FAT	GO:0032582	negative regulation of gene-specific transcription	0.121503
heart rate	GOTERM_BP_FAT	GO:0010553	negative regulation of specific transcription from RNA polymerase II promoter	0.120534
heart rate	GOTERM_BP_FAT	GO:0009187	cyclic nucleotide metabolic process	0.182884
heart rate	GOTERM_BP_FAT	GO:0009123	nucleoside monophosphate metabolic process	0.164051
heart rate	GOTERM_BP_FAT	GO:0006163	purine nucleotide metabolic process	0.156982
heart rate	GOTERM_BP_FAT	GO:0009190	cyclic nucleotide biosynthetic process	0.146023
heart rate	GOTERM_BP_FAT	GO:0006164	purine nucleotide biosynthetic process	0.137695
heart rate	GOTERM_BP_FAT	GO:0009124	nucleoside monophosphate biosynthetic process	0.125817
heart rate	GOTERM_BP_FAT	GO:0009165	nucleotide biosynthetic process	0.120096
heart rate	GOTERM_BP_FAT	GO:0006171	cAMP biosynthetic process	0.117466
heart rate	GOTERM_BP_FAT	GO:0034654	nucleobase, nucleoside, nucleotide and nucleic acid biosynthetic process	0.116582
heart rate	GOTERM_BP_FAT	GO:0034404	nucleobase, nucleoside and nucleotide biosynthetic process	0.116582
heart rate	GOTERM_BP_FAT	GO:0046068	cGMP metabolic process	0.10435
heart rate	GOTERM_BP_FAT	GO:0006182	cGMP biosynthetic process	0.0975789
heart rate	GOTERM_BP_FAT	GO:0001776	leukocyte homeostasis	0.173746
heart rate	GOTERM_BP_FAT	GO:0002260	lymphocyte homeostasis	0.152171
heart rate	GOTERM_BP_FAT	GO:0043029	T cell homeostasis	0.141986
heart rate	GOTERM_BP_FAT	GO:0070227	lymphocyte apoptosis	0.129684
heart rate	GOTERM_BP_FAT	GO:0006924	activation-induced cell death of T cells	0.0964122
heart rate	GOTERM_BP_FAT	GO:0070231	T cell apoptosis	0.0964122
heart rate	GOTERM_BP_FAT	GO:0045923	positive regulation of fatty acid metabolic process	0.173495
heart rate	GOTERM_BP_FAT	GO:0050996	positive regulation of lipid catabolic process	0.135436
heart rate	GOTERM_BP_FAT	GO:0046320	regulation of fatty acid oxidation	0.126304
heart rate	GOTERM_BP_FAT	GO:0031998	regulation of fatty acid beta-oxidation	0.1197
heart rate	GOTERM_BP_FAT	GO:0046321	positive regulation of fatty acid oxidation	0.1197
heart rate	GOTERM_BP_FAT	GO:0032000	positive regulation of fatty acid beta-oxidation	0.11405
heart rate	GOTERM_BP_FAT	GO:0051259	protein oligomerization	0.173399
heart rate	GOTERM_BP_FAT	GO:0043933	macromolecular complex subunit organization	0.137388
heart rate	GOTERM_BP_FAT	GO:0070271	protein complex biogenesis	0.118996
heart rate	GOTERM_BP_FAT	GO:0006461	protein complex assembly	0.118996
heart rate	GOTERM_BP_FAT	GO:0065003	macromolecular complex assembly	0.103186
heart rate	GOTERM_BP_FAT	GO:0051966	regulation of synaptic transmission, glutamatergic	0.147079
heart rate	GOTERM_BP_FAT	GO:0050806	positive regulation of synaptic transmission	0.138393
heart rate	GOTERM_BP_FAT	GO:0051968	positive regulation of synaptic transmission, glutamatergic	0.105652
heart rate	GOTERM_BP_FAT	GO:0048738	cardiac muscle tissue development	0.166305
heart rate	GOTERM_BP_FAT	GO:0006941	striated muscle contraction	0.163137
heart rate	SP_PIR_KEYWORDS	heart		0.147926
heart rate	SP_PIR_KEYWORDS	cardiac muscle		0.147926
heart rate	GOTERM_BP_FAT	GO:0048729	tissue morphogenesis	0.139752
heart rate	GOTERM_BP_FAT	GO:0060415	muscle tissue morphogenesis	0.139712
heart rate	GOTERM_BP_FAT	GO:0055008	cardiac muscle tissue morphogenesis	0.139712
heart rate	GOTERM_BP_FAT	GO:0003015	heart process	0.135583
heart rate	GOTERM_BP_FAT	GO:0060047	heart contraction	0.135583
heart rate	GOTERM_BP_FAT	GO:0003007	heart morphogenesis	0.133876
heart rate	SP_PIR_KEYWORDS	muscle contraction		0.130989
heart rate	GOTERM_BP_FAT	GO:0055010	ventricular cardiac muscle morphogenesis	0.124579
heart rate	GOTERM_BP_FAT	GO:0060048	cardiac muscle contraction	0.118039
heart rate	GOTERM_BP_FAT	GO:0043462	regulation of ATPase activity	0.111428
heart rate	GOTERM_CC_FAT	GO:0005865	striated muscle thin filament	0.0907675
heart rate	GOTERM_CC_FAT	GO:0005861	troponin complex	0.0892285
heart rate	SP_PIR_KEYWORDS	actin binding		0.086504
heart rate	GOTERM_BP_FAT	GO:0001701	in utero embryonic development	0.136015
heart rate	GOTERM_BP_FAT	GO:0009792	embryonic development ending in birth or egg hatching	0.127637
heart rate	GOTERM_BP_FAT	GO:0043009	chordate embryonic development	0.124348
heart rate	GOTERM_BP_FAT	GO:0030100	regulation of endocytosis	0.159445
heart rate	GOTERM_BP_FAT	GO:0045806	negative regulation of endocytosis	0.143725
heart rate	GOTERM_BP_FAT	GO:0060627	regulation of vesicle-mediated transport	0.143512
heart rate	GOTERM_BP_FAT	GO:0050764	regulation of phagocytosis	0.14024
heart rate	GOTERM_BP_FAT	GO:0050766	positive regulation of phagocytosis	0.0942824
heart rate	GOTERM_BP_FAT	GO:0045807	positive regulation of endocytosis	0.0939648
heart rate	KEGG_PATHWAY	hsa05330:Allograft rejection		0.134806
heart rate	KEGG_PATHWAY	hsa04940:Type I diabetes mellitus		0.132133
heart rate	KEGG_PATHWAY	hsa05332:Graft-versus-host disease		0.119397
heart rate	GOTERM_BP_FAT	GO:0015718	monocarboxylic acid transport	0.154796
heart rate	GOTERM_BP_FAT	GO:0015908	fatty acid transport	0.136633
heart rate	GOTERM_BP_FAT	GO:0015909	long-chain fatty acid transport	0.125879
heart rate	GOTERM_BP_FAT	GO:0046942	carboxylic acid transport	0.111434
heart rate	GOTERM_BP_FAT	GO:0015849	organic acid transport	0.1109
heart rate	GOTERM_BP_FAT	GO:0042743	hydrogen peroxide metabolic process	0.189917
heart rate	GOTERM_BP_FAT	GO:0034599	cellular response to oxidative stress	0.155508
heart rate	GOTERM_MF_FAT	GO:0016209	antioxidant activity	0.147494
heart rate	SP_PIR_KEYWORDS	peroxidase		0.12989
heart rate	GOTERM_BP_FAT	GO:0034614	cellular response to reactive oxygen species	0.120406
heart rate	GOTERM_MF_FAT	GO:0004601	peroxidase activity	0.116879
heart rate	GOTERM_MF_FAT	GO:0016684	oxidoreductase activity, acting on peroxide as acceptor	0.116879
heart rate	INTERPRO	IPR019791:Haem peroxidase, animal, subgroup		0.115039
heart rate	INTERPRO	IPR002007:Haem peroxidase, animal		0.115039
heart rate	GOTERM_BP_FAT	GO:0042744	hydrogen peroxide catabolic process	0.108134
heart rate	GOTERM_BP_FAT	GO:0070301	cellular response to hydrogen peroxide	0.106322
heart rate	SP_PIR_KEYWORDS	hydrogen peroxide		0.1042
heart rate	GOTERM_BP_FAT	GO:0044242	cellular lipid catabolic process	0.156196
heart rate	GOTERM_BP_FAT	GO:0016042	lipid catabolic process	0.136059
heart rate	GOTERM_BP_FAT	GO:0016054	organic acid catabolic process	0.135253
heart rate	GOTERM_BP_FAT	GO:0046395	carboxylic acid catabolic process	0.135253
heart rate	GOTERM_BP_FAT	GO:0009062	fatty acid catabolic process	0.132189
heart rate	GOTERM_BP_FAT	GO:0030258	lipid modification	0.127449
heart rate	GOTERM_BP_FAT	GO:0034440	lipid oxidation	0.127273
heart rate	GOTERM_BP_FAT	GO:0019395	fatty acid oxidation	0.127273
heart rate	SP_PIR_KEYWORDS	fatty acid beta-oxidation		0.112412
heart rate	GOTERM_BP_FAT	GO:0006635	fatty acid beta-oxidation	0.111866
heart rate	SP_PIR_KEYWORDS	fatty acid metabolism		0.1083
heart rate	KEGG_PATHWAY	hsa00071:Fatty acid metabolism		0.10054
heart rate	GOTERM_BP_FAT	GO:0001952	regulation of cell-matrix adhesion	0.181708
heart rate	GOTERM_BP_FAT	GO:0010810	regulation of cell-substrate adhesion	0.160905
heart rate	GOTERM_BP_FAT	GO:0007162	negative regulation of cell adhesion	0.131675
heart rate	GOTERM_BP_FAT	GO:0010812	negative regulation of cell-substrate adhesion	0.122449
heart rate	GOTERM_BP_FAT	GO:0051893	regulation of focal adhesion formation	0.116343
heart rate	GOTERM_BP_FAT	GO:0001954	positive regulation of cell-matrix adhesion	0.112737
heart rate	GOTERM_BP_FAT	GO:0001953	negative regulation of cell-matrix adhesion	0.109652
heart rate	GOTERM_BP_FAT	GO:0010811	positive regulation of cell-substrate adhesion	0.101621
heart rate	GOTERM_BP_FAT	GO:0051895	negative regulation of focal adhesion formation	0.0928912
heart rate	GOTERM_BP_FAT	GO:0042310	vasoconstriction	0.187533
heart rate	GOTERM_BP_FAT	GO:0002027	regulation of heart rate	0.18303
heart rate	GOTERM_BP_FAT	GO:0045823	positive regulation of heart contraction	0.163563
heart rate	GOTERM_BP_FAT	GO:0006939	smooth muscle contraction	0.163369
heart rate	GOTERM_BP_FAT	GO:0014829	vascular smooth muscle contraction	0.150384
heart rate	SP_PIR_KEYWORDS	vasoconstrictor		0.140737
heart rate	GOTERM_BP_FAT	GO:0010460	positive regulation of heart rate	0.125634
heart rate	GOTERM_BP_FAT	GO:0014826	vein smooth muscle contraction	0.116025
heart rate	GOTERM_BP_FAT	GO:0003100	regulation of systemic arterial blood pressure by endothelin	0.110163
heart rate	GOTERM_BP_FAT	GO:0014821	phasic smooth muscle contraction	0.109123
heart rate	UP_SEQ_FEATURE	region of interest:Endothelin-like		0.103858
heart rate	INTERPRO	IPR019764:Endothelin-like toxin, conserved site		0.102281
heart rate	INTERPRO	IPR001928:Endothelin-like toxin		0.102281
heart rate	SMART	SM00272:END		0.101922
heart rate	GOTERM_MF_FAT	GO:0031708	endothelin B receptor binding	0.0997776
heart rate	GOTERM_MF_FAT	GO:0031705	bombesin receptor binding	0.0997776
heart rate	PIR_SUPERFAMILY	PIRSF001632:endothelin		0.095811
heart rate	GOTERM_BP_FAT	GO:0048016	inositol phosphate-mediated signaling	0.0879571
heart rate	GOTERM_BP_FAT	GO:0042445	hormone metabolic process	0.164191
heart rate	GOTERM_BP_FAT	GO:0042446	hormone biosynthetic process	0.128038
heart rate	GOTERM_BP_FAT	GO:0034754	cellular hormone metabolic process	0.119449
heart rate	GOTERM_BP_FAT	GO:0008207	C21-steroid hormone metabolic process	0.10333
heart rate	GOTERM_BP_FAT	GO:0006700	C21-steroid hormone biosynthetic process	0.10164
heart rate	GOTERM_BP_FAT	GO:0051952	regulation of amine transport	0.148442
heart rate	GOTERM_BP_FAT	GO:0050433	regulation of catecholamine secretion	0.11395
heart rate	GOTERM_BP_FAT	GO:0014061	regulation of norepinephrine secretion	0.10449
heart rate	GOTERM_BP_FAT	GO:0010574	regulation of vascular endothelial growth factor production	0.148614
heart rate	GOTERM_BP_FAT	GO:0032642	regulation of chemokine production	0.123337
heart rate	GOTERM_BP_FAT	GO:0032755	positive regulation of interleukin-6 production	0.113507
heart rate	GOTERM_BP_FAT	GO:0032722	positive regulation of chemokine production	0.100607
heart rate	SP_PIR_KEYWORDS	camp		0.139939
heart rate	GOTERM_MF_FAT	GO:0030552	cAMP binding	0.137798
heart rate	SP_PIR_KEYWORDS	camp-binding		0.136736
heart rate	GOTERM_MF_FAT	GO:0030551	cyclic nucleotide binding	0.129465
heart rate	UP_SEQ_FEATURE	nucleotide phosphate-binding region:cAMP		0.128466
heart rate	GOTERM_MF_FAT	GO:0016208	AMP binding	0.127143
heart rate	UP_SEQ_FEATURE	region of interest:Involved in subunit assembly		0.119073
heart rate	INTERPRO	IPR013621:Ion transport N-terminal		0.116696
heart rate	INTERPRO	IPR018488:Cyclic nucleotide-binding, conserved site		0.108317
heart rate	PIR_SUPERFAMILY	PIRSF038514:potassium/sodium hyperpolarization-activated cyclic nucleotide-gated channel proteins		0.106928
heart rate	INTERPRO	IPR000595:Cyclic nucleotide-binding		0.105931
heart rate	INTERPRO	IPR014710:RmlC-like jelly roll fold		0.105931
heart rate	INTERPRO	IPR003938:Potassium channel, voltage-dependent, EAG/ELK/ERG		0.105498
heart rate	SMART	SM00100:cNMP		0.104967
heart rate	GOTERM_BP_FAT	GO:0006631	fatty acid metabolic process	0.190933
heart rate	GOTERM_BP_FAT	GO:0033559	unsaturated fatty acid metabolic process	0.147122
heart rate	GOTERM_BP_FAT	GO:0006692	prostanoid metabolic process	0.139742
heart rate	GOTERM_BP_FAT	GO:0006693	prostaglandin metabolic process	0.139742
heart rate	GOTERM_BP_FAT	GO:0006690	icosanoid metabolic process	0.131629
heart rate	KEGG_PATHWAY	hsa00590:Arachidonic acid metabolism		0.127449
heart rate	GOTERM_BP_FAT	GO:0046457	prostanoid biosynthetic process	0.117858
heart rate	GOTERM_BP_FAT	GO:0001516	prostaglandin biosynthetic process	0.117858
heart rate	GOTERM_BP_FAT	GO:0006633	fatty acid biosynthetic process	0.11299
heart rate	GOTERM_BP_FAT	GO:0006636	unsaturated fatty acid biosynthetic process	0.108924
heart rate	SP_PIR_KEYWORDS	prostaglandin biosynthesis		0.104122
heart rate	GOTERM_BP_FAT	GO:0046456	icosanoid biosynthetic process	0.102946
heart rate	SP_PIR_KEYWORDS	Fatty acid biosynthesis		0.101349
heart rate	GOTERM_BP_FAT	GO:0016053	organic acid biosynthetic process	0.0965198
heart rate	GOTERM_BP_FAT	GO:0046394	carboxylic acid biosynthetic process	0.0965198
heart rate	SP_PIR_KEYWORDS	lipid synthesis		0.0904829
heart rate	BIOCARTA	h_eicosanoidPathway:Eicosanoid Metabolism		0.071195
heart rate	GOTERM_BP_FAT	GO:0032943	mononuclear cell proliferation	0.136388
heart rate	GOTERM_BP_FAT	GO:0070661	leukocyte proliferation	0.136388
heart rate	GOTERM_BP_FAT	GO:0046651	lymphocyte proliferation	0.118058
heart rate	GOTERM_BP_FAT	GO:0042098	T cell proliferation	0.0981904
heart rate	GOTERM_BP_FAT	GO:0042100	B cell proliferation	0.0978203
heart rate	GOTERM_BP_FAT	GO:0042743	hydrogen peroxide metabolic process	0.184316
heart rate	GOTERM_BP_FAT	GO:0050665	hydrogen peroxide biosynthetic process	0.162268
heart rate	GOTERM_BP_FAT	GO:0042554	superoxide anion generation	0.145086
heart rate	UP_SEQ_FEATURE	domain:FAD-binding FR-type		0.137476
heart rate	INTERPRO	IPR017927:Ferredoxin reductase-type FAD-binding domain		0.132336
heart rate	GOTERM_MF_FAT	GO:0048037	cofactor binding	0.130814
heart rate	SP_PIR_KEYWORDS	FAD		0.130694
heart rate	GOTERM_MF_FAT	GO:0050661	NADP or NADPH binding	0.126822
heart rate	GOTERM_MF_FAT	GO:0050662	coenzyme binding	0.113444
heart rate	GOTERM_BP_FAT	GO:0006801	superoxide metabolic process	0.111873
heart rate	GOTERM_BP_FAT	GO:0045730	respiratory burst	0.111598
heart rate	GOTERM_MF_FAT	GO:0050664	oxidoreductase activity, acting on NADH or NADPH, with oxygen as acceptor	0.102048
heart rate	INTERPRO	IPR013121:Ferric reductase, NAD binding		0.101621
heart rate	INTERPRO	IPR013112:FAD-binding 8		0.101621
heart rate	GOTERM_MF_FAT	GO:0016175	superoxide-generating NADPH oxidase activity	0.101474
heart rate	GOTERM_MF_FAT	GO:0050660	FAD binding	0.0966645
heart rate	UP_SEQ_FEATURE	domain:Ferric oxidoreductase		0.0944234
heart rate	INTERPRO	IPR013130:Ferric reductase-like transmembrane component, N-terminal		0.0906279
heart rate	GOTERM_MF_FAT	GO:0016651	oxidoreductase activity, acting on NADH or NADPH	0.0900589
heart rate	GOTERM_CC_FAT	GO:0043020	NADPH oxidase complex	0.0809018
heart rate	GOTERM_BP_FAT	GO:0048738	cardiac muscle tissue development	0.159334
heart rate	GOTERM_BP_FAT	GO:0051146	striated muscle cell differentiation	0.128186
heart rate	GOTERM_BP_FAT	GO:0055007	cardiac muscle cell differentiation	0.0933683
heart rate	GOTERM_BP_FAT	GO:0035051	cardiac cell differentiation	0.0880486
heart rate	SP_PIR_KEYWORDS	potassium channel		0.190446
heart rate	UP_SEQ_FEATURE	short sequence motif:Selectivity filter		0.173382
heart rate	GOTERM_MF_FAT	GO:0015271	outward rectifier potassium channel activity	0.152797
heart rate	GOTERM_CC_FAT	GO:0008076	voltage-gated potassium channel complex	0.139994
heart rate	GOTERM_CC_FAT	GO:0034705	potassium channel complex	0.139994
heart rate	GOTERM_MF_FAT	GO:0005251	delayed rectifier potassium channel activity	0.130721
heart rate	INTERPRO	IPR003091:Voltage-dependent potassium channel		0.118055
heart rate	INTERPRO	IPR003972:Potassium channel, voltage dependent, Kv1		0.116154
heart rate	INTERPRO	IPR003968:Potassium channel, voltage dependent, Kv		0.115546
heart rate	SP_PIR_KEYWORDS	voltage-gated ion channel		0.107449
heart rate	PIR_SUPERFAMILY	PIRSF002449:potassium voltage-gated channel, alpha subunit, subfamilies A/C/D/F/G/S		0.0985586
heart rate	UP_SEQ_FEATURE	short sequence motif:PDZ-binding		0.0947457
heart rate	INTERPRO	IPR003131:Potassium channel, voltage dependent, Kv, tetramerisation		0.0901138
heart rate	INTERPRO	IPR000210:BTB/POZ-like		0.0688027
heart rate	INTERPRO	IPR011333:BTB/POZ fold		0.0686949
heart rate	SMART	SM00225:BTB		0.0685323
heart rate	GOTERM_BP_FAT	GO:0032770	positive regulation of monooxygenase activity	0.164463
heart rate	GOTERM_BP_FAT	GO:0030162	regulation of proteolysis	0.143444
heart rate	GOTERM_BP_FAT	GO:0060558	regulation of calcidiol 1-monooxygenase activity	0.136879
heart rate	GOTERM_BP_FAT	GO:0032642	regulation of chemokine production	0.120682
heart rate	GOTERM_BP_FAT	GO:0042176	regulation of protein catabolic process	0.114704
heart rate	GOTERM_BP_FAT	GO:0045862	positive regulation of proteolysis	0.111615
heart rate	GOTERM_BP_FAT	GO:0051043	regulation of membrane protein ectodomain proteolysis	0.11134
heart rate	GOTERM_BP_FAT	GO:0045732	positive regulation of protein catabolic process	0.108285
heart rate	GOTERM_BP_FAT	GO:0045073	regulation of chemokine biosynthetic process	0.104698
heart rate	GOTERM_BP_FAT	GO:0045080	positive regulation of chemokine biosynthetic process	0.0979521
heart rate	GOTERM_BP_FAT	GO:0060559	positive regulation of calcidiol 1-monooxygenase activity	0.0954744
heart rate	GOTERM_BP_FAT	GO:0051044	positive regulation of membrane protein ectodomain proteolysis	0.0927246
heart rate	GOTERM_BP_FAT	GO:0010522	regulation of calcium ion transport into cytosol	0.155202
heart rate	GOTERM_BP_FAT	GO:0051928	positive regulation of calcium ion transport	0.120745
heart rate	GOTERM_BP_FAT	GO:0010524	positive regulation of calcium ion transport into cytosol	0.108776
heart rate	GOTERM_BP_FAT	GO:0051279	regulation of release of sequestered calcium ion into cytosol	0.106321
heart rate	GOTERM_BP_FAT	GO:0051281	positive regulation of release of sequestered calcium ion into cytosol	0.0926596
heart rate	GOTERM_BP_FAT	GO:0042133	neurotransmitter metabolic process	0.130684
heart rate	GOTERM_BP_FAT	GO:0042136	neurotransmitter biosynthetic process	0.111203
heart rate	GOTERM_BP_FAT	GO:0001505	regulation of neurotransmitter levels	0.107698
heart rate	GOTERM_BP_FAT	GO:0051055	negative regulation of lipid biosynthetic process	0.151774
heart rate	GOTERM_BP_FAT	GO:0010894	negative regulation of steroid biosynthetic process	0.0925024
heart rate	GOTERM_BP_FAT	GO:0045939	negative regulation of steroid metabolic process	0.0925024
heart rate	SP_PIR_KEYWORDS	magnesium		0.124557
heart rate	UP_SEQ_FEATURE	metal ion-binding site:Magnesium		0.117524
heart rate	GOTERM_MF_FAT	GO:0000287	magnesium ion binding	0.092746
heart rate	GOTERM_BP_FAT	GO:0017144	drug metabolic process	0.114167
heart rate	GOTERM_BP_FAT	GO:0009410	response to xenobiotic stimulus	0.111612
heart rate	GOTERM_BP_FAT	GO:0006805	xenobiotic metabolic process	0.105105
heart rate	KEGG_PATHWAY	hsa05410:Hypertrophic cardiomyopathy (HCM)		0.126635
heart rate	KEGG_PATHWAY	hsa05414:Dilated cardiomyopathy		0.124738
heart rate	KEGG_PATHWAY	hsa05412:Arrhythmogenic right ventricular cardiomyopathy (ARVC)		0.0737314
heart rate	GOTERM_BP_FAT	GO:0042157	lipoprotein metabolic process	0.140324
heart rate	GOTERM_BP_FAT	GO:0042158	lipoprotein biosynthetic process	0.102818
heart rate	GOTERM_BP_FAT	GO:0006497	protein amino acid lipidation	0.0784628
heart rate	UP_SEQ_FEATURE	metal ion-binding site:Calcium 2		0.229038
heart rate	UP_SEQ_FEATURE	metal ion-binding site:Calcium 2; via carbonyl oxygen		0.207608
heart rate	UP_SEQ_FEATURE	metal ion-binding site:Calcium 1		0.207392
heart rate	SP_PIR_KEYWORDS	metalloproteinase		0.135085
heart rate	GOTERM_BP_FAT	GO:0044236	multicellular organismal metabolic process	0.131368
heart rate	UP_SEQ_FEATURE	metal ion-binding site:Zinc 2; catalytic		0.129337
heart rate	UP_SEQ_FEATURE	metal ion-binding site:Zinc 2; in inhibited form		0.125131
heart rate	UP_SEQ_FEATURE	propeptide:Activation peptide		0.123844
heart rate	GOTERM_BP_FAT	GO:0044259	multicellular organismal macromolecule metabolic process	0.118697
heart rate	GOTERM_BP_FAT	GO:0044243	multicellular organismal catabolic process	0.116156
heart rate	SP_PIR_KEYWORDS	fibroblast		0.113579
heart rate	UP_SEQ_FEATURE	metal ion-binding site:Calcium 3; via carbonyl oxygen		0.111811
heart rate	UP_SEQ_FEATURE	metal ion-binding site:Calcium 3		0.109857
heart rate	INTERPRO	IPR002477:Peptidoglycan binding-like		0.109522
heart rate	GOTERM_BP_FAT	GO:0032963	collagen metabolic process	0.101096
heart rate	UP_SEQ_FEATURE	metal ion-binding site:Calcium 4; via carbonyl oxygen		0.0979825
heart rate	UP_SEQ_FEATURE	domain:Hemopexin-like 4		0.0970973
heart rate	UP_SEQ_FEATURE	domain:Hemopexin-like 3		0.0970973
heart rate	UP_SEQ_FEATURE	domain:Hemopexin-like 2		0.0957257
heart rate	UP_SEQ_FEATURE	domain:Hemopexin-like 1		0.0957257
heart rate	INTERPRO	IPR006026:Peptidase, metallopeptidases		0.0955729
heart rate	SMART	SM00235:ZnMc		0.0947248
heart rate	INTERPRO	IPR000585:Hemopexin/matrixin		0.0923883
heart rate	INTERPRO	IPR018487:Hemopexin/matrixin, repeat		0.0923883
heart rate	INTERPRO	IPR018486:Hemopexin/matrixin, conserved site		0.0923883
heart rate	SP_PIR_KEYWORDS	collagen degradation		0.0921602
heart rate	INTERPRO	IPR006025:Peptidase M, neutral zinc metallopeptidases, zinc-binding site		0.0917694
heart rate	SMART	SM00120:HX		0.0916589
heart rate	UP_SEQ_FEATURE	short sequence motif:Cysteine switch		0.0863566
heart rate	SP_PIR_KEYWORDS	metalloprotease		0.0857015
heart rate	INTERPRO	IPR001818:Peptidase M10A and M12B, matrixin and adamalysin		0.0829476
heart rate	GOTERM_BP_FAT	GO:0030574	collagen catabolic process	0.0815304
heart rate	INTERPRO	IPR016293:Peptidase M10A, matrix metallopeotidase		0.0775752
heart rate	BIOCARTA	h_reckPathway:Inhibition of Matrix Metalloproteinases		0.075122
heart rate	UP_SEQ_FEATURE	metal ion-binding site:Zinc 1		0.0721651
heart rate	PIR_SUPERFAMILY	PIRSF001191:Peptidase_M10A_matrix		0.070415
heart rate	GOTERM_MF_FAT	GO:0004222	metalloendopeptidase activity	0.0686247
heart rate	GOTERM_MF_FAT	GO:0008237	metallopeptidase activity	0.0666448
heart rate	GOTERM_CC_FAT	GO:0031012	extracellular matrix	0.112096
heart rate	GOTERM_CC_FAT	GO:0005578	proteinaceous extracellular matrix	0.104598
heart rate	SP_PIR_KEYWORDS	extracellular matrix		0.103819
heart rate	GOTERM_BP_FAT	GO:0050707	regulation of cytokine secretion	0.132509
heart rate	GOTERM_BP_FAT	GO:0002718	regulation of cytokine production during immune response	0.120669
heart rate	GOTERM_BP_FAT	GO:0002740	negative regulation of cytokine secretion during immune response	0.105162
heart rate	GOTERM_BP_FAT	GO:0002739	regulation of cytokine secretion during immune response	0.105162
heart rate	GOTERM_BP_FAT	GO:0050710	negative regulation of cytokine secretion	0.0982595
heart rate	GOTERM_BP_FAT	GO:0050709	negative regulation of protein secretion	0.0978024
heart rate	GOTERM_BP_FAT	GO:0051224	negative regulation of protein transport	0.0792882
heart rate	GOTERM_BP_FAT	GO:0031000	response to caffeine	0.123749
heart rate	GOTERM_BP_FAT	GO:0060402	calcium ion transport into cytosol	0.117538
heart rate	GOTERM_BP_FAT	GO:0051209	release of sequestered calcium ion into cytosol	0.116867
heart rate	GOTERM_BP_FAT	GO:0051283	negative regulation of sequestering of calcium ion	0.116867
heart rate	GOTERM_BP_FAT	GO:0051282	regulation of sequestering of calcium ion	0.116867
heart rate	GOTERM_BP_FAT	GO:0060401	cytosolic calcium ion transport	0.115034
heart rate	GOTERM_BP_FAT	GO:0014074	response to purine	0.114338
heart rate	GOTERM_MF_FAT	GO:0005217	intracellular ligand-gated ion channel activity	0.0852485
heart rate	GOTERM_CC_FAT	GO:0033017	sarcoplasmic reticulum membrane	0.0842937
heart rate	GOTERM_MF_FAT	GO:0005219	ryanodine-sensitive calcium-release channel activity	0.0809507
heart rate	GOTERM_MF_FAT	GO:0005218	intracellular ligand-gated calcium channel activity	0.0809507
heart rate	GOTERM_BP_FAT	GO:0006576	biogenic amine metabolic process	0.17517
heart rate	GOTERM_BP_FAT	GO:0046470	phosphatidylcholine metabolic process	0.141794
heart rate	GOTERM_BP_FAT	GO:0042439	ethanolamine and derivative metabolic process	0.136199
heart rate	GOTERM_BP_FAT	GO:0006650	glycerophospholipid metabolic process	0.103804
heart rate	GOTERM_BP_FAT	GO:0006644	phospholipid metabolic process	0.0926925
heart rate	GOTERM_BP_FAT	GO:0019637	organophosphate metabolic process	0.0887066
heart rate	GOTERM_BP_FAT	GO:0006656	phosphatidylcholine biosynthetic process	0.0886916
heart rate	GOTERM_BP_FAT	GO:0045017	glycerolipid biosynthetic process	0.0794594
heart rate	GOTERM_BP_FAT	GO:0046474	glycerophospholipid biosynthetic process	0.0749719
heart rate	GOTERM_BP_FAT	GO:0008654	phospholipid biosynthetic process	0.0653424
heart rate	GOTERM_BP_FAT	GO:0007618	mating	0.153976
heart rate	GOTERM_BP_FAT	GO:0019098	reproductive behavior	0.120074
heart rate	GOTERM_BP_FAT	GO:0051705	behavioral interaction between organisms	0.110533
heart rate	GOTERM_BP_FAT	GO:0007617	mating behavior	0.101706
heart rate	GOTERM_BP_FAT	GO:0033057	reproductive behavior in a multicellular organism	0.0949787
heart rate	GOTERM_BP_FAT	GO:0035176	social behavior	0.0917522
heart rate	GOTERM_BP_FAT	GO:0060746	parental behavior	0.0909182
heart rate	GOTERM_BP_FAT	GO:0042711	maternal behavior	0.0909182
heart rate	GOTERM_BP_FAT	GO:0001967	suckling behavior	0.0856907
heart rate	UP_SEQ_FEATURE	short sequence motif:Selectivity filter		0.166186
heart rate	UP_SEQ_FEATURE	site:Role in the control of polyamine-mediated channel gating and in the blocking by intracellular magnesium		0.108392
heart rate	UP_SEQ_FEATURE	region of interest:H5 (pore-forming helix)		0.106142
heart rate	INTERPRO	IPR013518:Potassium channel, inwardly rectifying, Kir, cytoplasmic		0.102545
heart rate	INTERPRO	IPR001838:Potassium channel, inwardly rectifying, Kir-like		0.102545
heart rate	INTERPRO	IPR016449:Potassium channel, inwardly rectifying, Kir		0.102545
heart rate	INTERPRO	IPR013521:Potassium channel, inwardly rectifying, Kir, conserved region 2		0.102545
heart rate	GOTERM_MF_FAT	GO:0005242	inward rectifier potassium channel activity	0.0978619
heart rate	PIR_SUPERFAMILY	PIRSF005465:GIRK_kir		0.0883444
heart rate	PIR_SUPERFAMILY	PIRSF005465:G protein-activated inward rectifier potassium channel		0.0883444
heart rate	GOTERM_MF_FAT	GO:0015272	ATP-activated inward rectifier potassium channel activity	0.0839253
heart rate	GOTERM_BP_FAT	GO:0007623	circadian rhythm	0.114438
heart rate	GOTERM_BP_FAT	GO:0042752	regulation of circadian rhythm	0.111683
heart rate	GOTERM_BP_FAT	GO:0022410	circadian sleep/wake cycle process	0.109605
heart rate	GOTERM_BP_FAT	GO:0042749	regulation of circadian sleep/wake cycle	0.109605
heart rate	GOTERM_BP_FAT	GO:0045187	regulation of circadian sleep/wake cycle, sleep	0.109605
heart rate	GOTERM_BP_FAT	GO:0042745	circadian sleep/wake cycle	0.106346
heart rate	GOTERM_BP_FAT	GO:0048512	circadian behavior	0.10085
heart rate	GOTERM_BP_FAT	GO:0042753	positive regulation of circadian rhythm	0.0978493
heart rate	GOTERM_BP_FAT	GO:0007622	rhythmic behavior	0.0963517
heart rate	GOTERM_BP_FAT	GO:0042320	regulation of circadian sleep/wake cycle, REM sleep	0.0935028
heart rate	GOTERM_BP_FAT	GO:0045938	positive regulation of circadian sleep/wake cycle, sleep	0.0831976
heart rate	INTERPRO	IPR000324:Vitamin D receptor		0.109114
heart rate	SP_PIR_KEYWORDS	steroid-binding		0.107491
heart rate	UP_SEQ_FEATURE	region of interest:Steroid-binding		0.0990298
heart rate	UP_SEQ_FEATURE	region of interest:Hinge		0.0946097
heart rate	GOTERM_BP_FAT	GO:0046887	positive regulation of hormone secretion	0.130832
heart rate	GOTERM_BP_FAT	GO:0002793	positive regulation of peptide secretion	0.0954272
heart rate	GOTERM_BP_FAT	GO:0032024	positive regulation of insulin secretion	0.0814084
heart rate	GOTERM_BP_FAT	GO:0010660	regulation of muscle cell apoptosis	0.144783
heart rate	GOTERM_BP_FAT	GO:0010656	negative regulation of muscle cell apoptosis	0.119931
heart rate	GOTERM_BP_FAT	GO:0051153	regulation of striated muscle cell differentiation	0.103194
heart rate	GOTERM_BP_FAT	GO:0010665	regulation of cardiac muscle cell apoptosis	0.0872503
heart rate	GOTERM_BP_FAT	GO:0010667	negative regulation of cardiac muscle cell apoptosis	0.0872503
heart rate	GOTERM_BP_FAT	GO:0010662	regulation of striated muscle cell apoptosis	0.0872503
heart rate	GOTERM_BP_FAT	GO:0010664	negative regulation of striated muscle cell apoptosis	0.0872503
heart rate	GOTERM_BP_FAT	GO:0009890	negative regulation of biosynthetic process	0.142787
heart rate	GOTERM_BP_FAT	GO:0010605	negative regulation of macromolecule metabolic process	0.140069
heart rate	GOTERM_BP_FAT	GO:0031327	negative regulation of cellular biosynthetic process	0.134466
heart rate	GOTERM_BP_FAT	GO:0010558	negative regulation of macromolecule biosynthetic process	0.104105
heart rate	GOTERM_BP_FAT	GO:0051172	negative regulation of nitrogen compound metabolic process	0.098794
heart rate	GOTERM_BP_FAT	GO:0045934	negative regulation of nucleobase, nucleoside, nucleotide and nucleic acid metabolic process	0.0942744
heart rate	GOTERM_BP_FAT	GO:0010629	negative regulation of gene expression	0.0932966
heart rate	GOTERM_BP_FAT	GO:0016481	negative regulation of transcription	0.0895794
heart rate	GOTERM_BP_FAT	GO:0000122	negative regulation of transcription from RNA polymerase II promoter	0.0877723
heart rate	GOTERM_BP_FAT	GO:0045892	negative regulation of transcription, DNA-dependent	0.0822676
heart rate	GOTERM_BP_FAT	GO:0051253	negative regulation of RNA metabolic process	0.0808487
heart rate	GOTERM_MF_FAT	GO:0016564	transcription repressor activity	0.0767639
heart rate	SP_PIR_KEYWORDS	blood		0.11809
heart rate	GOTERM_BP_FAT	GO:0015669	gas transport	0.118029
heart rate	SP_PIR_KEYWORDS	oxygen transport		0.114723
heart rate	UP_SEQ_FEATURE	metal ion-binding site:Iron (heme distal ligand)		0.11452
heart rate	INTERPRO	IPR012292:Globin		0.110771
heart rate	INTERPRO	IPR000971:Globin, subset		0.110771
heart rate	SP_PIR_KEYWORDS	erythrocyte		0.110599
heart rate	UP_SEQ_FEATURE	metal ion-binding site:Iron (heme proximal ligand)		0.106356
heart rate	GOTERM_BP_FAT	GO:0015671	oxygen transport	0.102261
heart rate	GOTERM_MF_FAT	GO:0005344	oxygen transporter activity	0.101982
heart rate	SP_PIR_KEYWORDS	oxygen carrier		0.091752
heart rate	SP_PIR_KEYWORDS	heterotetramer		0.0893111
heart rate	PIR_SUPERFAMILY	PIRSF036518:globin		0.0855371
heart rate	INTERPRO	IPR002337:Haemoglobin, beta		0.0811332
heart rate	PIR_SUPERFAMILY	PIRSF500045:hemoglobin, vertebrate type		0.0804073
heart rate	GOTERM_CC_FAT	GO:0005833	hemoglobin complex	0.078394
heart rate	GOTERM_BP_FAT	GO:0032652	regulation of interleukin-1 production	0.13284
heart rate	GOTERM_BP_FAT	GO:0050707	regulation of cytokine secretion	0.129137
heart rate	GOTERM_BP_FAT	GO:0032651	regulation of interleukin-1 beta production	0.126528
heart rate	GOTERM_BP_FAT	GO:0050715	positive regulation of cytokine secretion	0.105538
heart rate	GOTERM_BP_FAT	GO:0032732	positive regulation of interleukin-1 production	0.0924638
heart rate	GOTERM_BP_FAT	GO:0050706	regulation of interleukin-1 beta secretion	0.0877169
heart rate	GOTERM_BP_FAT	GO:0032731	positive regulation of interleukin-1 beta production	0.0858135
heart rate	GOTERM_BP_FAT	GO:0050704	regulation of interleukin-1 secretion	0.0840879
heart rate	GOTERM_BP_FAT	GO:0050718	positive regulation of interleukin-1 beta secretion	0.0774436
heart rate	GOTERM_BP_FAT	GO:0050716	positive regulation of interleukin-1 secretion	0.0747296
heart rate	GOTERM_BP_FAT	GO:0032098	regulation of appetite	0.12073
heart rate	GOTERM_BP_FAT	GO:0032095	regulation of response to food	0.12073
heart rate	GOTERM_BP_FAT	GO:0032107	regulation of response to nutrient levels	0.117236
heart rate	GOTERM_BP_FAT	GO:0032104	regulation of response to extracellular stimulus	0.117236
heart rate	GOTERM_BP_FAT	GO:0032099	negative regulation of appetite	0.101711
heart rate	GOTERM_BP_FAT	GO:0032096	negative regulation of response to food	0.101711
heart rate	GOTERM_BP_FAT	GO:0032108	negative regulation of response to nutrient levels	0.0880629
heart rate	GOTERM_BP_FAT	GO:0032105	negative regulation of response to extracellular stimulus	0.0880629
heart rate	GOTERM_BP_FAT	GO:0008343	adult feeding behavior	0.0828355
heart rate	GOTERM_BP_FAT	GO:0032109	positive regulation of response to nutrient levels	0.078048
heart rate	GOTERM_BP_FAT	GO:0032106	positive regulation of response to extracellular stimulus	0.078048
heart rate	GOTERM_BP_FAT	GO:0014829	vascular smooth muscle contraction	0.136065
heart rate	GOTERM_BP_FAT	GO:0014824	artery smooth muscle contraction	0.0811932
heart rate	GOTERM_BP_FAT	GO:0014820	tonic smooth muscle contraction	0.0811932
heart rate	GOTERM_BP_FAT	GO:0007620	copulation	0.12655
heart rate	GOTERM_BP_FAT	GO:0003078	regulation of natriuresis	0.120473
heart rate	GOTERM_BP_FAT	GO:0044062	regulation of excretion	0.115367
heart rate	GOTERM_BP_FAT	GO:0003084	positive regulation of systemic arterial blood pressure	0.105564
heart rate	GOTERM_BP_FAT	GO:0007320	insemination	0.0918658
heart rate	GOTERM_BP_FAT	GO:0045723	positive regulation of fatty acid biosynthetic process	0.0918658
heart rate	GOTERM_BP_FAT	GO:0003079	positive regulation of natriuresis	0.0809401
heart rate	GOTERM_BP_FAT	GO:0002118	aggressive behavior	0.0809401
heart rate	GOTERM_BP_FAT	GO:0042713	sperm ejaculation	0.0777902
heart rate	GOTERM_BP_FAT	GO:0043278	response to morphine	0.107372
heart rate	GOTERM_BP_FAT	GO:0014072	response to isoquinoline alkaloid	0.107372
heart rate	GOTERM_BP_FAT	GO:0008306	associative learning	0.0803505
heart rate	SP_PIR_KEYWORDS	chemotaxis		0.130385
heart rate	INTERPRO	IPR001089:Small chemokine, C-X-C		0.123215
heart rate	INTERPRO	IPR001811:Small chemokine, interleukin-8-like		0.118339
heart rate	SMART	SM00199:SCY		0.116954
heart rate	INTERPRO	IPR018048:Small chemokine, C-X-C, conserved site		0.111173
heart rate	PIR_SUPERFAMILY	PIRSF002522:CXC chemokine		0.101659
heart rate	GOTERM_MF_FAT	GO:0008009	chemokine activity	0.101389
heart rate	GOTERM_MF_FAT	GO:0042379	chemokine receptor binding	0.0979409
heart rate	INTERPRO	IPR002473:Small chemokine, C-X-C/Interleukin 8		0.0891247
heart rate	INTERPRO	IPR000827:Small chemokine, C-C group, conserved site		0.0674729
heart rate	PIR_SUPERFAMILY	PIRSF001950:small inducible chemokine, C/CC types		0.0623519
heart rate	BBID	109.Chemokine_families		0.0562482
heart rate	GOTERM_BP_FAT	GO:0042359	vitamin D metabolic process	0.119605
heart rate	GOTERM_BP_FAT	GO:0006775	fat-soluble vitamin metabolic process	0.0891044
heart rate	GOTERM_BP_FAT	GO:0006766	vitamin metabolic process	0.0838369
heart rate	GOTERM_BP_FAT	GO:0033135	regulation of peptidyl-serine phosphorylation	0.148
heart rate	GOTERM_BP_FAT	GO:0002637	regulation of immunoglobulin production	0.110672
heart rate	GOTERM_BP_FAT	GO:0033138	positive regulation of peptidyl-serine phosphorylation	0.110071
heart rate	BBID	19.Cytokine_microglia		0.090916
heart rate	BBID	21.Cytokine_neurons		0.0620697
heart rate	BBID	20.Cytokine_oligodendrocytes		0.0620697
heart rate	SP_PIR_KEYWORDS	SH2 domain		0.113253
heart rate	INTERPRO	IPR000980:SH2 motif		0.103975
heart rate	SMART	SM00252:SH2		0.102258
heart rate	UP_SEQ_FEATURE	domain:SH2		0.0856126
heart rate	GOTERM_MF_FAT	GO:0004715	non-membrane spanning protein tyrosine kinase activity	0.0806209
heart rate	GOTERM_BP_FAT	GO:0044246	regulation of multicellular organismal metabolic process	0.134722
heart rate	GOTERM_BP_FAT	GO:0044253	positive regulation of multicellular organismal metabolic process	0.115624
heart rate	GOTERM_BP_FAT	GO:0010712	regulation of collagen metabolic process	0.102734
heart rate	GOTERM_BP_FAT	GO:0032965	regulation of collagen biosynthetic process	0.0905112
heart rate	GOTERM_BP_FAT	GO:0002021	response to dietary excess	0.0860261
heart rate	GOTERM_BP_FAT	GO:0010714	positive regulation of collagen metabolic process	0.0836182
heart rate	GOTERM_BP_FAT	GO:0032967	positive regulation of collagen biosynthetic process	0.0836182
heart rate	GOTERM_BP_FAT	GO:0002024	diet induced thermogenesis	0.0764356
heart rate	GOTERM_BP_FAT	GO:0044087	regulation of cellular component biogenesis	0.161373
heart rate	GOTERM_BP_FAT	GO:0032970	regulation of actin filament-based process	0.0977751
heart rate	GOTERM_BP_FAT	GO:0032231	regulation of actin filament bundle formation	0.0954122
heart rate	GOTERM_BP_FAT	GO:0051495	positive regulation of cytoskeleton organization	0.0931307
heart rate	GOTERM_BP_FAT	GO:0051493	regulation of cytoskeleton organization	0.0886215
heart rate	GOTERM_BP_FAT	GO:0051492	regulation of stress fiber formation	0.0872312
heart rate	GOTERM_BP_FAT	GO:0032956	regulation of actin cytoskeleton organization	0.0867932
heart rate	GOTERM_BP_FAT	GO:0032271	regulation of protein polymerization	0.0622022
heart rate	GOTERM_BP_FAT	GO:0006941	striated muscle contraction	0.144313
heart rate	GOTERM_BP_FAT	GO:0003009	skeletal muscle contraction	0.0880052
heart rate	GOTERM_BP_FAT	GO:0050879	multicellular organismal movement	0.0766868
heart rate	GOTERM_BP_FAT	GO:0050881	musculoskeletal movement	0.0766868
heart rate	GOTERM_BP_FAT	GO:0051899	membrane depolarization	0.137916
heart rate	GOTERM_BP_FAT	GO:0060078	regulation of postsynaptic membrane potential	0.0918384
heart rate	GOTERM_BP_FAT	GO:0060079	regulation of excitatory postsynaptic membrane potential	0.0870532
heart rate	GOTERM_CC_FAT	GO:0042734	presynaptic membrane	0.0682118
heart rate	SP_PIR_KEYWORDS	sodium channel		0.147866
heart rate	GOTERM_MF_FAT	GO:0005272	sodium channel activity	0.135274
heart rate	GOTERM_MF_FAT	GO:0005248	voltage-gated sodium channel activity	0.108553
heart rate	GOTERM_CC_FAT	GO:0001518	voltage-gated sodium channel complex	0.102841
heart rate	INTERPRO	IPR001696:Na+ channel		0.0973866
heart rate	INTERPRO	IPR010526:Sodium ion transport-associated		0.0973866
heart rate	GOTERM_CC_FAT	GO:0034706	sodium channel complex	0.094976
heart rate	UP_SEQ_FEATURE	domain:IQ		0.0934179
heart rate	UP_SEQ_FEATURE	repeat:III		0.0859107
heart rate	UP_SEQ_FEATURE	repeat:IV		0.0859107
heart rate	UP_SEQ_FEATURE	repeat:I		0.0859107
heart rate	UP_SEQ_FEATURE	repeat:II		0.0859107
heart rate	PIR_SUPERFAMILY	PIRSF002448:voltage-gated sodium channel		0.0853656
heart rate	INTERPRO	IPR000048:IQ calmodulin-binding region		0.0681152
heart rate	SMART	SM00015:IQ		0.0674015
heart rate	GOTERM_MF_FAT	GO:0001530	lipopolysaccharide binding	0.137428
heart rate	GOTERM_MF_FAT	GO:0001875	lipopolysaccharide receptor activity	0.116095
heart rate	GOTERM_MF_FAT	GO:0008329	pattern recognition receptor activity	0.0966476
heart rate	GOTERM_CC_FAT	GO:0046696	lipopolysaccharide receptor complex	0.0941733
heart rate	GOTERM_BP_FAT	GO:0032497	detection of lipopolysaccharide	0.0836579
heart rate	GOTERM_BP_FAT	GO:0032490	detection of molecule of bacterial origin	0.0761206
heart rate	GOTERM_BP_FAT	GO:0009595	detection of biotic stimulus	0.0686353
heart rate	GOTERM_BP_FAT	GO:0006112	energy reserve metabolic process	0.137172
heart rate	SP_PIR_KEYWORDS	carbohydrate metabolism		0.105405
heart rate	SP_PIR_KEYWORDS	glycogen storage disease		0.0988314
heart rate	GOTERM_BP_FAT	GO:0005977	glycogen metabolic process	0.0947453
heart rate	GOTERM_BP_FAT	GO:0044042	glucan metabolic process	0.0934626
heart rate	GOTERM_BP_FAT	GO:0006073	cellular glucan metabolic process	0.0934626
heart rate	SP_PIR_KEYWORDS	glycogen metabolism		0.0904576
heart rate	GOTERM_BP_FAT	GO:0044264	cellular polysaccharide metabolic process	0.0776644
heart rate	GOTERM_BP_FAT	GO:0005976	polysaccharide metabolic process	0.0633335
heart rate	GOTERM_BP_FAT	GO:0042108	positive regulation of cytokine biosynthetic process	0.106607
heart rate	GOTERM_BP_FAT	GO:0032655	regulation of interleukin-12 production	0.102339
heart rate	GOTERM_BP_FAT	GO:0045084	positive regulation of interleukin-12 biosynthetic process	0.0849317
heart rate	GOTERM_BP_FAT	GO:0045075	regulation of interleukin-12 biosynthetic process	0.0820993
heart rate	GOTERM_BP_FAT	GO:0046356	acetyl-CoA catabolic process	0.101735
heart rate	GOTERM_BP_FAT	GO:0006099	tricarboxylic acid cycle	0.101735
heart rate	GOTERM_BP_FAT	GO:0006732	coenzyme metabolic process	0.0994157
heart rate	GOTERM_BP_FAT	GO:0051187	cofactor catabolic process	0.0993325
heart rate	GOTERM_BP_FAT	GO:0006084	acetyl-CoA metabolic process	0.0993325
heart rate	GOTERM_BP_FAT	GO:0009109	coenzyme catabolic process	0.0962909
heart rate	GOTERM_BP_FAT	GO:0009060	aerobic respiration	0.0936091
heart rate	GOTERM_BP_FAT	GO:0045333	cellular respiration	0.092106
heart rate	SP_PIR_KEYWORDS	tricarboxylic acid cycle		0.0907808
heart rate	KEGG_PATHWAY	hsa00020:Citrate cycle (TCA cycle)		0.0786772
heart rate	GOTERM_BP_FAT	GO:0043648	dicarboxylic acid metabolic process	0.069473
heart rate	GOTERM_BP_FAT	GO:0030278	regulation of ossification	0.144562
heart rate	GOTERM_BP_FAT	GO:0030500	regulation of bone mineralization	0.100767
heart rate	GOTERM_BP_FAT	GO:0070167	regulation of biomineral formation	0.097638
heart rate	GOTERM_BP_FAT	GO:0030279	negative regulation of ossification	0.0949601
heart rate	GOTERM_BP_FAT	GO:0045778	positive regulation of ossification	0.0781797
heart rate	GOTERM_BP_FAT	GO:0030501	positive regulation of bone mineralization	0.0666721
heart rate	GOTERM_BP_FAT	GO:0070169	positive regulation of biomineral formation	0.0658497
heart rate	SP_PIR_KEYWORDS	lymphokine		0.208176
heart rate	GOTERM_BP_FAT	GO:0050864	regulation of B cell activation	0.144425
heart rate	GOTERM_BP_FAT	GO:0002697	regulation of immune effector process	0.143379
heart rate	GOTERM_BP_FAT	GO:0002700	regulation of production of molecular mediator of immune response	0.139777
heart rate	BIOCARTA	h_inflamPathway:Cytokines and Inflammatory Response		0.139002
heart rate	BIOCARTA	h_cytokinePathway:Cytokine Network		0.133057
heart rate	GOTERM_BP_FAT	GO:0002703	regulation of leukocyte mediated immunity	0.127906
heart rate	GOTERM_BP_FAT	GO:0002822	regulation of adaptive immune response based on somatic recombination of immune receptors built from immunoglobulin superfamily domains	0.126372
heart rate	GOTERM_BP_FAT	GO:0002819	regulation of adaptive immune response	0.124867
heart rate	GOTERM_BP_FAT	GO:0002706	regulation of lymphocyte mediated immunity	0.11746
heart rate	KEGG_PATHWAY	hsa05330:Allograft rejection		0.114078
heart rate	GOTERM_BP_FAT	GO:0045191	regulation of isotype switching	0.113188
heart rate	GOTERM_BP_FAT	GO:0002637	regulation of immunoglobulin production	0.107873
heart rate	GOTERM_BP_FAT	GO:0050871	positive regulation of B cell activation	0.106873
heart rate	BBID	58.(CD40L)_immnosurveillance		0.0948955
heart rate	BBID	97.Immune_injury_MS-lesions_MS_antigen		0.0948955
heart rate	GOTERM_BP_FAT	GO:0045830	positive regulation of isotype switching	0.0938457
heart rate	GOTERM_BP_FAT	GO:0045911	positive regulation of DNA recombination	0.0938457
heart rate	GOTERM_BP_FAT	GO:0045073	regulation of chemokine biosynthetic process	0.0907613
heart rate	KEGG_PATHWAY	hsa05320:Autoimmune thyroid disease		0.0891103
heart rate	BBID	19.Cytokine_microglia		0.088117
heart rate	BBID	88.Alternatively_Activated_APC		0.088117
heart rate	GOTERM_BP_FAT	GO:0002712	regulation of B cell mediated immunity	0.0880898
heart rate	GOTERM_BP_FAT	GO:0002889	regulation of immunoglobulin mediated immune response	0.0880898
heart rate	GOTERM_BP_FAT	GO:0048304	positive regulation of isotype switching to IgG isotypes	0.0874554
heart rate	GOTERM_BP_FAT	GO:0000018	regulation of DNA recombination	0.0852605
heart rate	BBID	18.Cytokine_astocytes		0.084586
heart rate	BIOCARTA	h_dcPathway:Dendritic cells in regulating TH1 and TH2 Development		0.084161
heart rate	BIOCARTA	h_il18Pathway:IL 18 Signaling Pathway		0.0835376
heart rate	GOTERM_BP_FAT	GO:0030890	positive regulation of B cell proliferation	0.0832924
heart rate	BBID	22.Cytokine-chemokine_CNS		0.0827393
heart rate	BBID	111.Stress_influences_immunity		0.0820528
heart rate	BBID	112.StressandCRHinfluence		0.0820528
heart rate	BBID	59.L-type_Ca2+_Tat_immune_cells		0.0817233
heart rate	GOTERM_BP_FAT	GO:0048302	regulation of isotype switching to IgG isotypes	0.0811829
heart rate	GOTERM_BP_FAT	GO:0045346	regulation of MHC class II biosynthetic process	0.0811829
heart rate	BBID	113.Th1andTh2cells		0.0755199
heart rate	BIOCARTA	h_nktPathway:Selective expression of chemokine receptors during T-cell polarization		0.0749465
heart rate	GOTERM_BP_FAT	GO:0045348	positive regulation of MHC class II biosynthetic process	0.0740003
heart rate	BIOCARTA	h_LairPathway:Cells and Molecules involved in local acute inflammatory response		0.0731948
heart rate	BBID	56.Macrophage_regulation_of_CD4+T_cells		0.0720651
heart rate	BIOCARTA	h_th1th2Pathway:Th1/Th2 Differentiation		0.071678
heart rate	BBID	35.Chemokines_EAE_Autoreactive_T_Cells		0.0708165
heart rate	BBID	80.T_cell_Activation		0.0693746
heart rate	BIOCARTA	h_asbcellPathway:Antigen Dependent B Cell Activation		0.0675277
heart rate	BIOCARTA	h_il10Pathway:IL-10 Anti-inflammatory Signaling Pathway		0.066839
heart rate	KEGG_PATHWAY	hsa04672:Intestinal immune network for IgA production		0.0633171
heart rate	BBID	9.CKS-17_cytokines		0.0624536
heart rate	KEGG_PATHWAY	hsa05310:Asthma		0.0621639
heart rate	BBID	15.T-cell_polarization-chemokine_receptors		0.0616124
heart rate	BBID	89.CD4_T_Cell_Differentiation		0.0590491
heart rate	BIOCARTA	h_tob1Pathway:Role of Tob in T-cell activation		0.0589532
heart rate	BBID	5.B7_CD40_B-cell_activa		0.0574882
heart rate	SP_PIR_KEYWORDS	calmodulin-binding		0.104277
heart rate	GOTERM_MF_FAT	GO:0005516	calmodulin binding	0.0942749
heart rate	UP_SEQ_FEATURE	region of interest:Calmodulin-binding		0.0778233
heart rate	GOTERM_BP_FAT	GO:0010745	negative regulation of foam cell differentiation	0.135334
heart rate	GOTERM_BP_FAT	GO:0010871	negative regulation of receptor biosynthetic process	0.0736146
heart rate	GOTERM_BP_FAT	GO:0010869	regulation of receptor biosynthetic process	0.0661764
heart rate	GOTERM_BP_FAT	GO:0015749	monosaccharide transport	0.135398
heart rate	GOTERM_BP_FAT	GO:0015758	glucose transport	0.126587
heart rate	GOTERM_BP_FAT	GO:0008645	hexose transport	0.124272
heart rate	GOTERM_BP_FAT	GO:0008643	carbohydrate transport	0.0989638
heart rate	GOTERM_MF_FAT	GO:0015145	monosaccharide transmembrane transporter activity	0.0734526
heart rate	GOTERM_MF_FAT	GO:0005355	glucose transmembrane transporter activity	0.0685525
heart rate	GOTERM_MF_FAT	GO:0051119	sugar transmembrane transporter activity	0.0669137
heart rate	GOTERM_MF_FAT	GO:0015149	hexose transmembrane transporter activity	0.0656379
heart rate	SP_PIR_KEYWORDS	sugar transport		0.0600065
heart rate	GOTERM_BP_FAT	GO:0048008	platelet-derived growth factor receptor signaling pathway	0.124157
heart rate	GOTERM_MF_FAT	GO:0005161	platelet-derived growth factor receptor binding	0.101986
heart rate	INTERPRO	IPR000072:Platelet-derived growth factor (PDGF)		0.0673447
heart rate	SMART	SM00141:PDGF		0.0670278
heart rate	GOTERM_BP_FAT	GO:0030194	positive regulation of blood coagulation	0.10582
heart rate	GOTERM_BP_FAT	GO:0016525	negative regulation of angiogenesis	0.0999591
heart rate	GOTERM_BP_FAT	GO:0050820	positive regulation of coagulation	0.0959506
heart rate	GOTERM_BP_FAT	GO:0051917	regulation of fibrinolysis	0.0773355
heart rate	GOTERM_BP_FAT	GO:0051918	negative regulation of fibrinolysis	0.0701122
heart rate	GOTERM_BP_FAT	GO:0002460	adaptive immune response based on somatic recombination of immune receptors built from immunoglobulin superfamily domains	0.134163
heart rate	GOTERM_BP_FAT	GO:0002250	adaptive immune response	0.134163
heart rate	GOTERM_BP_FAT	GO:0051604	protein maturation	0.120071
heart rate	GOTERM_BP_FAT	GO:0002252	immune effector process	0.110238
heart rate	GOTERM_BP_FAT	GO:0016485	protein processing	0.106331
heart rate	GOTERM_BP_FAT	GO:0002443	leukocyte mediated immunity	0.106258
heart rate	GOTERM_BP_FAT	GO:0002449	lymphocyte mediated immunity	0.0974269
heart rate	GOTERM_BP_FAT	GO:0006959	humoral immune response	0.0970632
heart rate	GOTERM_BP_FAT	GO:0019724	B cell mediated immunity	0.0947639
heart rate	GOTERM_BP_FAT	GO:0051605	protein maturation by peptide bond cleavage	0.0913831
heart rate	GOTERM_BP_FAT	GO:0045087	innate immune response	0.0889671
heart rate	GOTERM_BP_FAT	GO:0016064	immunoglobulin mediated immune response	0.0884662
heart rate	GOTERM_BP_FAT	GO:0002253	activation of immune response	0.0797976
heart rate	SP_PIR_KEYWORDS	innate immunity		0.07768
heart rate	GOTERM_BP_FAT	GO:0006958	complement activation, classical pathway	0.0713734
heart rate	SP_PIR_KEYWORDS	complement pathway		0.0699423
heart rate	GOTERM_BP_FAT	GO:0002455	humoral immune response mediated by circulating immunoglobulin	0.0697165
heart rate	GOTERM_BP_FAT	GO:0006956	complement activation	0.0688358
heart rate	GOTERM_BP_FAT	GO:0002541	activation of plasma proteins involved in acute inflammatory response	0.0682107
heart rate	BIOCARTA	h_compPathway:Complement Pathway		0.0527104
heart rate	BIOCARTA	h_lectinPathway:Lectin Induced Complement Pathway		0.0525654
heart rate	GOTERM_MF_FAT	GO:0070325	lipoprotein receptor binding	0.120536
heart rate	UP_SEQ_FEATURE	region of interest:LDL receptor binding		0.0836734
heart rate	GOTERM_MF_FAT	GO:0070326	very-low-density lipoprotein receptor binding	0.0795928
heart rate	GOTERM_MF_FAT	GO:0050750	low-density lipoprotein receptor binding	0.0729335
heart rate	UP_SEQ_FEATURE	domain:FAD-binding FR-type		0.121157
heart rate	INTERPRO	IPR017927:Ferredoxin reductase-type FAD-binding domain		0.116017
heart rate	GOTERM_MF_FAT	GO:0048037	cofactor binding	0.114495
heart rate	SP_PIR_KEYWORDS	FAD		0.114375
heart rate	GOTERM_MF_FAT	GO:0050662	coenzyme binding	0.097125
heart rate	UP_SEQ_FEATURE	nucleotide phosphate-binding region:FAD		0.096372
heart rate	INTERPRO	IPR003097:FAD-binding, type 1		0.0888026
heart rate	COG_ONTOLOGY	Inorganic ion transport and metabolism		0.0875514
heart rate	UP_SEQ_FEATURE	domain:Flavodoxin-like		0.0846488
heart rate	INTERPRO	IPR008254:Flavodoxin/nitric oxide synthase		0.0824096
heart rate	INTERPRO	IPR001094:Flavodoxin-like		0.0824096
heart rate	SP_PIR_KEYWORDS	Flavoprotein		0.0820117
heart rate	GOTERM_MF_FAT	GO:0050660	FAD binding	0.0803453
heart rate	UP_SEQ_FEATURE	nucleotide phosphate-binding region:NADP		0.0802381
heart rate	INTERPRO	IPR001709:Flavoprotein pyridine nucleotide cytochrome reductase		0.0799549
heart rate	UP_SEQ_FEATURE	nucleotide phosphate-binding region:FMN		0.0748952
heart rate	INTERPRO	IPR001433:Oxidoreductase FAD/NAD(P)-binding		0.0743087
heart rate	GOTERM_MF_FAT	GO:0016651	oxidoreductase activity, acting on NADH or NADPH	0.0737397
heart rate	SP_PIR_KEYWORDS	fmn		0.0712244
heart rate	GOTERM_MF_FAT	GO:0010181	FMN binding	0.0710371
heart rate	SP_PIR_KEYWORDS	zymogen		0.168256
heart rate	SP_PIR_KEYWORDS	serine proteinase		0.124838
heart rate	GOTERM_BP_FAT	GO:0042730	fibrinolysis	0.114406
heart rate	UP_SEQ_FEATURE	active site:Charge relay system		0.112923
heart rate	INTERPRO	IPR018059:Kringle, subgroup		0.108003
heart rate	SP_PIR_KEYWORDS	kringle		0.107564
heart rate	INTERPRO	IPR000001:Kringle		0.10298
heart rate	INTERPRO	IPR018056:Kringle, conserved site		0.10298
heart rate	SMART	SM00130:KR		0.102042
heart rate	UP_SEQ_FEATURE	glycosylation site:O-linked (Fuc)		0.101061
heart rate	SP_PIR_KEYWORDS	Plasminogen activation		0.0952295
heart rate	SP_PIR_KEYWORDS	hydrolase		0.0911037
heart rate	SP_PIR_KEYWORDS	Protease		0.0902562
heart rate	SP_PIR_KEYWORDS	fibrinolysis		0.0872494
heart rate	UP_SEQ_FEATURE	domain:Kringle 2		0.0871266
heart rate	UP_SEQ_FEATURE	domain:Kringle 1		0.0871266
heart rate	SP_PIR_KEYWORDS	Serine protease		0.086319
heart rate	UP_SEQ_FEATURE	domain:Peptidase S1		0.0817296
heart rate	INTERPRO	IPR001314:Peptidase S1A, chymotrypsin		0.0768873
heart rate	BIOCARTA	h_fibrinolysisPathway:Fibrinolysis Pathway		0.0763455
heart rate	GOTERM_MF_FAT	GO:0004252	serine-type endopeptidase activity	0.0749816
heart rate	GOTERM_MF_FAT	GO:0004175	endopeptidase activity	0.0746682
heart rate	BIOCARTA	h_plateletAppPathway:Platelet Amyloid Precursor Protein Pathway		0.0734025
heart rate	INTERPRO	IPR001254:Peptidase S1 and S6, chymotrypsin/Hap		0.0718097
heart rate	INTERPRO	IPR018114:Peptidase S1/S6, chymotrypsin/Hap, active site		0.071113
heart rate	SMART	SM00020:Tryp_SPc		0.0707086
heart rate	GOTERM_MF_FAT	GO:0017171	serine hydrolase activity	0.0698408
heart rate	GOTERM_MF_FAT	GO:0008236	serine-type peptidase activity	0.0669716
heart rate	UP_SEQ_FEATURE	domain:Kringle		0.0650396
heart rate	GOTERM_MF_FAT	GO:0008233	peptidase activity	0.0590084
heart rate	GOTERM_MF_FAT	GO:0070011	peptidase activity, acting on L-amino acid peptides	0.0589932
heart rate	GOTERM_BP_FAT	GO:0006508	proteolysis	0.0508184
heart rate	GOTERM_BP_FAT	GO:0032890	regulation of organic acid transport	0.11332
heart rate	GOTERM_BP_FAT	GO:0032891	negative regulation of organic acid transport	0.0879873
heart rate	GOTERM_BP_FAT	GO:0010748	negative regulation of plasma membrane long-chain fatty acid transport	0.0743762
heart rate	GOTERM_BP_FAT	GO:0010746	regulation of plasma membrane long-chain fatty acid transport	0.0743762
heart rate	SP_PIR_KEYWORDS	carboxyglutamic acid		0.118662
heart rate	SP_PIR_KEYWORDS	gamma-carboxyglutamic acid		0.105055
heart rate	UP_SEQ_FEATURE	site:Cleavage; by thrombin		0.102324
heart rate	UP_SEQ_FEATURE	domain:Gla		0.10115
heart rate	SP_PIR_KEYWORDS	beta-hydroxyaspartic acid		0.0987801
heart rate	INTERPRO	IPR000294:Gamma-carboxyglutamic acid-rich (GLA) domain		0.0974771
heart rate	SMART	SM00069:GLA		0.0966744
heart rate	BIOCARTA	h_amiPathway:Acute Myocardial Infarction		0.0898584
heart rate	BIOCARTA	h_extrinsicPathway:Extrinsic Prothrombin Activation Pathway		0.0873195
heart rate	SP_PIR_KEYWORDS	vitamin K		0.0870161
heart rate	INTERPRO	IPR002383:Coagulation factor, Gla region		0.0736268
heart rate	INTERPRO	IPR012224:Peptidase S1A, coagulation factor VII/IX/X/C/Z		0.0734691
heart rate	GOTERM_BP_FAT	GO:0007598	blood coagulation, extrinsic pathway	0.0711942
heart rate	PIR_SUPERFAMILY	PIRSF001143:coagulation factor X		0.0673453
heart rate	PIR_SUPERFAMILY	PIRSF001143:Factor_X		0.0673453
heart rate	BIOCARTA	h_intrinsicPathway:Intrinsic Prothrombin Activation Pathway		0.0620394
heart rate	GOTERM_CC_FAT	GO:0044433	cytoplasmic vesicle part	0.139516
heart rate	GOTERM_CC_FAT	GO:0031092	platelet alpha granule membrane	0.0880796
heart rate	GOTERM_CC_FAT	GO:0012506	vesicle membrane	0.0726905
heart rate	GOTERM_CC_FAT	GO:0030667	secretory granule membrane	0.0703126
heart rate	GOTERM_CC_FAT	GO:0030659	cytoplasmic vesicle membrane	0.0649964
heart rate	GOTERM_BP_FAT	GO:0008637	apoptotic mitochondrial changes	0.212656
heart rate	GOTERM_BP_FAT	GO:0001836	release of cytochrome c from mitochondria	0.16556
heart rate	GOTERM_BP_FAT	GO:0007005	mitochondrion organization	0.11951
heart rate	GOTERM_BP_FAT	GO:0051881	regulation of mitochondrial membrane potential	0.1179
heart rate	GOTERM_BP_FAT	GO:0010332	response to gamma radiation	0.111086
heart rate	GOTERM_BP_FAT	GO:0046902	regulation of mitochondrial membrane permeability	0.100185
heart rate	GOTERM_BP_FAT	GO:0043393	regulation of protein binding	0.0989176
heart rate	GOTERM_BP_FAT	GO:0043497	regulation of protein heterodimerization activity	0.0942912
heart rate	GOTERM_BP_FAT	GO:0032469	endoplasmic reticulum calcium ion homeostasis	0.0940797
heart rate	GOTERM_BP_FAT	GO:0070059	apoptosis in response to endoplasmic reticulum stress	0.0884293
heart rate	BIOCARTA	h_chemicalPathway:Apoptotic Signaling in Response to DNA Damage		0.0864907
heart rate	GOTERM_BP_FAT	GO:0001782	B cell homeostasis	0.0847033
heart rate	GOTERM_BP_FAT	GO:0007006	mitochondrial membrane organization	0.0840134
heart rate	GOTERM_BP_FAT	GO:0043496	regulation of protein homodimerization activity	0.0806427
heart rate	UP_SEQ_FEATURE	short sequence motif:BH3		0.0803553
heart rate	GOTERM_BP_FAT	GO:0032471	reduction of endoplasmic reticulum calcium ion concentration	0.0781649
heart rate	UP_SEQ_FEATURE	short sequence motif:BH1		0.0768558
heart rate	UP_SEQ_FEATURE	short sequence motif:BH2		0.0736468
heart rate	INTERPRO	IPR002475:BCL2-like apoptosis inhibitor		0.0730603
heart rate	INTERPRO	IPR000712:Apoptosis regulator Bcl-2, BH		0.0715607
heart rate	GOTERM_BP_FAT	GO:0051402	neuron apoptosis	0.0710145
heart rate	SMART	SM00337:BCL		0.0709933
heart rate	BIOCARTA	h_mitochondriaPathway:Role of Mitochondria in Apoptotic Signaling		0.0709356
heart rate	GOTERM_BP_FAT	GO:0006839	mitochondrial transport	0.0692899
heart rate	GOTERM_BP_FAT	GO:0008584	male gonad development	0.0672101
heart rate	BBID	127.Mito-stress		0.0662625
heart rate	BIOCARTA	h_badPathway:Regulation of BAD phosphorylation		0.0656846
heart rate	BBID	46.P13K_PTEN		0.0625955
heart rate	GOTERM_BP_FAT	GO:0046546	development of primary male sexual characteristics	0.0611966
heart rate	GOTERM_BP_FAT	GO:0046661	male sex differentiation	0.0585474
heart rate	BBID	152.altered_synaptic_signalling-neurodegenerative_disorders		0.0578021
heart rate	BIOCARTA	h_p53Pathway:p53 Signaling Pathway		0.0532037
heart rate	GOTERM_CC_FAT	GO:0000323	lytic vacuole	0.103674
heart rate	GOTERM_CC_FAT	GO:0005764	lysosome	0.103674
heart rate	GOTERM_CC_FAT	GO:0005773	vacuole	0.0938406
heart rate	SP_PIR_KEYWORDS	lysosome		0.0798473
heart rate	KEGG_PATHWAY	hsa04142:Lysosome		0.0504998
heart rate	GOTERM_BP_FAT	GO:0051147	regulation of muscle cell differentiation	0.0942629
heart rate	GOTERM_BP_FAT	GO:0051153	regulation of striated muscle cell differentiation	0.0938541
heart rate	GOTERM_BP_FAT	GO:0016202	regulation of striated muscle tissue development	0.0904793
heart rate	GOTERM_BP_FAT	GO:0048634	regulation of muscle development	0.0894301
heart rate	GOTERM_BP_FAT	GO:0048641	regulation of skeletal muscle tissue development	0.0877276
heart rate	GOTERM_BP_FAT	GO:0048742	regulation of skeletal muscle fiber development	0.0732731
heart rate	GOTERM_BP_FAT	GO:0051149	positive regulation of muscle cell differentiation	0.0730961
heart rate	BIOCARTA	h_granulocytesPathway:Adhesion and Diapedesis of Granulocytes		0.126147
heart rate	GOTERM_BP_FAT	GO:0007159	leukocyte adhesion	0.100118
heart rate	BIOCARTA	h_lympathway:Adhesion and Diapedesis of Lymphocytes		0.0913157
heart rate	GOTERM_BP_FAT	GO:0045123	cellular extravasation	0.0868233
heart rate	GOTERM_BP_FAT	GO:0050901	leukocyte tethering or rolling	0.0835174
heart rate	BIOCARTA	h_neutrophilPathway:Neutrophil and Its Surface Molecules		0.0761783
heart rate	BIOCARTA	h_monocytePathway:Monocyte and its Surface Molecules		0.0749802
heart rate	GOTERM_BP_FAT	GO:0007157	heterophilic cell adhesion	0.0672593
heart rate	BIOCARTA	h_lymphocytePathway:Adhesion Molecules on Lymphocyte		0.0629009
heart rate	GOTERM_MF_FAT	GO:0001609	adenosine receptor activity, G-protein coupled	0.109462
heart rate	INTERPRO	IPR001634:Adenosine receptor		0.096745
heart rate	GOTERM_MF_FAT	GO:0016502	nucleotide receptor activity	0.0871082
heart rate	GOTERM_MF_FAT	GO:0001614	purinergic nucleotide receptor activity	0.0871082
heart rate	PIR_SUPERFAMILY	PIRSF005692:adenosine receptor		0.0869771
heart rate	GOTERM_MF_FAT	GO:0001608	nucleotide receptor activity, G-protein coupled	0.0767655
heart rate	GOTERM_MF_FAT	GO:0045028	purinergic nucleotide receptor activity, G-protein coupled	0.0767655
heart rate	INTERPRO	IPR002286:P2 purinoceptor		0.0547686
heart rate	GOTERM_BP_FAT	GO:0060558	regulation of calcidiol 1-monooxygenase activity	0.11839
heart rate	BIOCARTA	h_tidPathway:Chaperones modulate interferon Signaling Pathway		0.073985
heart rate	GOTERM_BP_FAT	GO:0060556	regulation of vitamin D biosynthetic process	0.072598
heart rate	GOTERM_BP_FAT	GO:0030656	regulation of vitamin metabolic process	0.072598
heart rate	GOTERM_BP_FAT	GO:0046006	regulation of activated T cell proliferation	0.111885
heart rate	GOTERM_BP_FAT	GO:0042102	positive regulation of T cell proliferation	0.103125
heart rate	GOTERM_BP_FAT	GO:0042104	positive regulation of activated T cell proliferation	0.0887516
heart rate	GOTERM_BP_FAT	GO:0046013	regulation of T cell homeostatic proliferation	0.0764434
heart rate	BIOCARTA	h_th1th2Pathway:Th1/Th2 Differentiation		0.0665838
heart rate	BIOCARTA	h_tob1Pathway:Role of Tob in T-cell activation		0.0538591
heart rate	GOTERM_BP_FAT	GO:0051354	negative regulation of oxidoreductase activity	0.0921511
heart rate	GOTERM_BP_FAT	GO:0032769	negative regulation of monooxygenase activity	0.088594
heart rate	GOTERM_BP_FAT	GO:0051001	negative regulation of nitric-oxide synthase activity	0.0687485
heart rate	GOTERM_BP_FAT	GO:0010984	regulation of lipoprotein particle clearance	0.101752
heart rate	GOTERM_BP_FAT	GO:0010985	negative regulation of lipoprotein particle clearance	0.0864111
heart rate	GOTERM_BP_FAT	GO:0010916	negative regulation of very-low-density lipoprotein particle clearance	0.0717595
heart rate	GOTERM_BP_FAT	GO:0010915	regulation of very-low-density lipoprotein particle clearance	0.0717595
heart rate	GOTERM_BP_FAT	GO:0042692	muscle cell differentiation	0.125018
heart rate	GOTERM_BP_FAT	GO:0051146	striated muscle cell differentiation	0.108593
heart rate	SP_PIR_KEYWORDS	muscle contraction		0.104425
heart rate	GOTERM_BP_FAT	GO:0055001	muscle cell development	0.0828163
heart rate	GOTERM_BP_FAT	GO:0055002	striated muscle cell development	0.0714596
heart rate	GOTERM_BP_FAT	GO:0030239	myofibril assembly	0.0667463
heart rate	GOTERM_BP_FAT	GO:0048747	muscle fiber development	0.0630457
heart rate	GOTERM_BP_FAT	GO:0010927	cellular component assembly involved in morphogenesis	0.0624128
heart rate	GOTERM_BP_FAT	GO:0031032	actomyosin structure organization	0.0609826
heart rate	GOTERM_BP_FAT	GO:0019058	viral infectious cycle	0.107131
heart rate	GOTERM_BP_FAT	GO:0022415	viral reproductive process	0.101687
heart rate	GOTERM_BP_FAT	GO:0019059	initiation of viral infection	0.0978026
heart rate	GOTERM_BP_FAT	GO:0016032	viral reproduction	0.0924697
heart rate	GOTERM_BP_FAT	GO:0019047	provirus integration	0.07553
heart rate	GOTERM_BP_FAT	GO:0030069	lysogeny	0.07553
heart rate	GOTERM_BP_FAT	GO:0015074	DNA integration	0.059279
heart rate	GOTERM_BP_FAT	GO:0006310	DNA recombination	0.0502522
heart rate	GOTERM_BP_FAT	GO:0032989	cellular component morphogenesis	0.110483
heart rate	GOTERM_BP_FAT	GO:0048666	neuron development	0.0987332
heart rate	GOTERM_BP_FAT	GO:0000902	cell morphogenesis	0.0921198
heart rate	GOTERM_BP_FAT	GO:0030182	neuron differentiation	0.090929
heart rate	GOTERM_BP_FAT	GO:0031175	neuron projection development	0.0884346
heart rate	GOTERM_BP_FAT	GO:0030030	cell projection organization	0.0805851
heart rate	GOTERM_BP_FAT	GO:0048812	neuron projection morphogenesis	0.0794222
heart rate	GOTERM_BP_FAT	GO:0032990	cell part morphogenesis	0.0760417
heart rate	GOTERM_BP_FAT	GO:0000904	cell morphogenesis involved in differentiation	0.0725189
heart rate	GOTERM_BP_FAT	GO:0048858	cell projection morphogenesis	0.0687619
heart rate	GOTERM_BP_FAT	GO:0048667	cell morphogenesis involved in neuron differentiation	0.0655582
heart rate	GOTERM_BP_FAT	GO:0007409	axonogenesis	0.0634018
heart rate	SP_PIR_KEYWORDS	phosphatidylinositol linkage		0.107033
heart rate	SP_PIR_KEYWORDS	blocked carboxyl end		0.0896043
heart rate	SP_PIR_KEYWORDS	gpi-anchor		0.0816205
heart rate	UP_SEQ_FEATURE	propeptide:Removed in mature form		0.0786644
heart rate	GOTERM_CC_FAT	GO:0031225	anchored to membrane	0.0536457
heart rate	GOTERM_BP_FAT	GO:0043500	muscle adaptation	0.111055
heart rate	GOTERM_BP_FAT	GO:0043501	skeletal muscle adaptation	0.0712261
heart rate	GOTERM_BP_FAT	GO:0014888	striated muscle adaptation	0.0636715
heart rate	GOTERM_BP_FAT	GO:0032890	regulation of organic acid transport	0.109809
heart rate	GOTERM_BP_FAT	GO:0051954	positive regulation of amine transport	0.0885179
heart rate	GOTERM_BP_FAT	GO:0051955	regulation of amino acid transport	0.0844763
heart rate	GOTERM_BP_FAT	GO:0014054	positive regulation of gamma-aminobutyric acid secretion	0.0752525
heart rate	GOTERM_BP_FAT	GO:0051957	positive regulation of amino acid transport	0.0752525
heart rate	GOTERM_BP_FAT	GO:0014052	regulation of gamma-aminobutyric acid secretion	0.0708652
heart rate	GOTERM_BP_FAT	GO:0032892	positive regulation of organic acid transport	0.0652795
heart rate	INTERPRO	IPR006209:EGF		0.15674
heart rate	INTERPRO	IPR000742:EGF-like, type 3		0.131473
heart rate	INTERPRO	IPR006210:EGF-like		0.126631
heart rate	SP_PIR_KEYWORDS	egf-like domain		0.124581
heart rate	SMART	SM00181:EGF		0.12397
heart rate	UP_SEQ_FEATURE	repeat:LDL-receptor class B 6		0.114649
heart rate	INTERPRO	IPR013032:EGF-like region, conserved site		0.112636
heart rate	INTERPRO	IPR000033:Low-density lipoprotein receptor, YWTD repeat		0.106813
heart rate	SMART	SM00135:LY		0.105851
heart rate	UP_SEQ_FEATURE	repeat:LDL-receptor class B 5		0.100051
heart rate	UP_SEQ_FEATURE	repeat:LDL-receptor class B 3		0.0973458
heart rate	UP_SEQ_FEATURE	repeat:LDL-receptor class B 4		0.0973458
heart rate	UP_SEQ_FEATURE	repeat:LDL-receptor class B 2		0.0973458
heart rate	UP_SEQ_FEATURE	repeat:LDL-receptor class B 1		0.0973458
heart rate	INTERPRO	IPR000152:EGF-type aspartate/asparagine hydroxylation conserved site		0.0897584
heart rate	UP_SEQ_FEATURE	domain:EGF-like 1		0.0834444
heart rate	INTERPRO	IPR018097:EGF-like calcium-binding, conserved site		0.0833898
heart rate	INTERPRO	IPR001881:EGF-like calcium-binding		0.0833898
heart rate	UP_SEQ_FEATURE	repeat:LDL-receptor class B 7		0.0830889
heart rate	UP_SEQ_FEATURE	repeat:LDL-receptor class B 8		0.0830889
heart rate	UP_SEQ_FEATURE	repeat:LDL-receptor class B 9		0.0830889
heart rate	SMART	SM00179:EGF_CA		0.0819851
heart rate	UP_SEQ_FEATURE	domain:EGF-like 3		0.0812781
heart rate	INTERPRO	IPR011042:Six-bladed beta-propeller, TolB-like		0.0806447
heart rate	UP_SEQ_FEATURE	domain:EGF-like		0.080637
heart rate	GOTERM_CC_FAT	GO:0005905	coated pit	0.077264
heart rate	UP_SEQ_FEATURE	domain:LDL-receptor class A 2		0.0760578
heart rate	UP_SEQ_FEATURE	domain:LDL-receptor class A 1		0.0760578
heart rate	UP_SEQ_FEATURE	short sequence motif:Endocytosis signal		0.0756916
heart rate	UP_SEQ_FEATURE	domain:EGF-like 2		0.0738748
heart rate	UP_SEQ_FEATURE	domain:LDL-receptor class A 7		0.0736179
heart rate	UP_SEQ_FEATURE	domain:LDL-receptor class A 6		0.0736179
heart rate	UP_SEQ_FEATURE	domain:EGF-like 5		0.0729363
heart rate	UP_SEQ_FEATURE	domain:LDL-receptor class A 3		0.0719756
heart rate	UP_SEQ_FEATURE	domain:LDL-receptor class A 5		0.0719278
heart rate	UP_SEQ_FEATURE	repeat:LDL-receptor class B 20		0.0686623
heart rate	UP_SEQ_FEATURE	repeat:LDL-receptor class B 17		0.0686623
heart rate	UP_SEQ_FEATURE	repeat:LDL-receptor class B 18		0.0686623
heart rate	UP_SEQ_FEATURE	repeat:LDL-receptor class B 19		0.0686623
heart rate	UP_SEQ_FEATURE	repeat:LDL-receptor class B 13		0.0686623
heart rate	UP_SEQ_FEATURE	repeat:LDL-receptor class B 14		0.0686623
heart rate	UP_SEQ_FEATURE	repeat:LDL-receptor class B 15		0.0686623
heart rate	UP_SEQ_FEATURE	repeat:LDL-receptor class B 16		0.0686623
heart rate	UP_SEQ_FEATURE	repeat:LDL-receptor class B 11		0.0686623
heart rate	UP_SEQ_FEATURE	repeat:LDL-receptor class B 12		0.0686623
heart rate	UP_SEQ_FEATURE	repeat:LDL-receptor class B 10		0.0686623
heart rate	UP_SEQ_FEATURE	domain:LDL-receptor class A 4		0.0666304
heart rate	UP_SEQ_FEATURE	domain:EGF-like 7; calcium-binding		0.0663344
heart rate	INTERPRO	IPR013091:EGF calcium-binding		0.0650524
heart rate	SP_PIR_KEYWORDS	Endocytosis		0.0648949
heart rate	UP_SEQ_FEATURE	domain:LDL-receptor class A 8		0.0648916
heart rate	INTERPRO	IPR002172:Low density lipoprotein-receptor, class A, cysteine-rich		0.0638644
heart rate	UP_SEQ_FEATURE	domain:EGF-like 6		0.0638297
heart rate	UP_SEQ_FEATURE	domain:EGF-like 2; calcium-binding		0.0634639
heart rate	SMART	SM00192:LDLa		0.0631832
heart rate	SP_PIR_KEYWORDS	coated pit		0.0629571
heart rate	UP_SEQ_FEATURE	domain:EGF-like 8		0.0593494
heart rate	UP_SEQ_FEATURE	domain:EGF-like 4		0.0574301
heart rate	UP_SEQ_FEATURE	domain:EGF-like 4; calcium-binding		0.0554823
heart rate	UP_SEQ_FEATURE	domain:EGF-like 9		0.0533216
heart rate	UP_SEQ_FEATURE	domain:EGF-like 7		0.0519552
heart rate	GOTERM_BP_FAT	GO:0003085	negative regulation of systemic arterial blood pressure	0.0950473
heart rate	GOTERM_MF_FAT	GO:0004935	adrenoceptor activity	0.0838083
heart rate	GOTERM_BP_FAT	GO:0001993	regulation of systemic arterial blood pressure by norepinephrine-epinephrine	0.0628689
heart rate	GOTERM_BP_FAT	GO:0034101	erythrocyte homeostasis	0.0882684
heart rate	GOTERM_BP_FAT	GO:0030218	erythrocyte differentiation	0.0860415
heart rate	GOTERM_BP_FAT	GO:0048821	erythrocyte development	0.0663977
heart rate	GOTERM_BP_FAT	GO:0048609	reproductive process in a multicellular organism	0.135449
heart rate	GOTERM_BP_FAT	GO:0032504	multicellular organism reproduction	0.135449
heart rate	GOTERM_BP_FAT	GO:0007276	gamete generation	0.0664389
heart rate	GOTERM_BP_FAT	GO:0019953	sexual reproduction	0.0662746
heart rate	GOTERM_BP_FAT	GO:0048610	reproductive cellular process	0.0607894
heart rate	GOTERM_BP_FAT	GO:0048232	male gamete generation	0.0482245
heart rate	GOTERM_BP_FAT	GO:0007283	spermatogenesis	0.0482245
heart rate	GOTERM_BP_FAT	GO:0032429	regulation of phospholipase A2 activity	0.0845676
heart rate	GOTERM_BP_FAT	GO:0032430	positive regulation of phospholipase A2 activity	0.0845676
heart rate	GOTERM_BP_FAT	GO:0032431	activation of phospholipase A2 activity	0.069916
heart rate	BIOCARTA	h_stemPathway:Regulation of hematopoiesis by cytokines		0.10021
heart rate	BBID	7.IL17_hematopoesis		0.069899
heart rate	BIOCARTA	h_il17Pathway:IL 17 Signaling Pathway		0.0683362
heart rate	GOTERM_BP_FAT	GO:0050877	neurological system process	0.136546
heart rate	GOTERM_BP_FAT	GO:0050890	cognition	0.054352
heart rate	GOTERM_BP_FAT	GO:0007600	sensory perception	0.0451353
heart rate	GOTERM_BP_FAT	GO:0022407	regulation of cell-cell adhesion	0.0954456
heart rate	GOTERM_BP_FAT	GO:0045995	regulation of embryonic development	0.0755809
heart rate	GOTERM_BP_FAT	GO:0034114	regulation of heterotypic cell-cell adhesion	0.0735276
heart rate	GOTERM_BP_FAT	GO:0070587	regulation of cell-cell adhesion involved in gastrulation	0.0735276
heart rate	GOTERM_BP_FAT	GO:0010470	regulation of gastrulation	0.0735276
heart rate	GOTERM_MF_FAT	GO:0004620	phospholipase activity	0.0864343
heart rate	GOTERM_MF_FAT	GO:0016298	lipase activity	0.0808617
heart rate	GOTERM_MF_FAT	GO:0004435	phosphoinositide phospholipase C activity	0.0779973
heart rate	GOTERM_MF_FAT	GO:0008081	phosphoric diester hydrolase activity	0.0726475
heart rate	GOTERM_MF_FAT	GO:0004629	phospholipase C activity	0.0707798
heart rate	GOTERM_BP_FAT	GO:0032409	regulation of transporter activity	0.0983301
heart rate	GOTERM_BP_FAT	GO:0022898	regulation of transmembrane transporter activity	0.0874244
heart rate	GOTERM_BP_FAT	GO:0034762	regulation of transmembrane transport	0.085805
heart rate	GOTERM_BP_FAT	GO:0051925	regulation of calcium ion transport via voltage-gated calcium channel activity	0.0702448
heart rate	GOTERM_BP_FAT	GO:0032412	regulation of ion transmembrane transporter activity	0.0694795
heart rate	GOTERM_BP_FAT	GO:0034765	regulation of ion transmembrane transport	0.0683568
heart rate	GOTERM_BP_FAT	GO:0032410	negative regulation of transporter activity	0.0620605
heart rate	GOTERM_BP_FAT	GO:0044243	multicellular organismal catabolic process	0.0993273
heart rate	GOTERM_BP_FAT	GO:0044266	multicellular organismal macromolecule catabolic process	0.0729922
heart rate	GOTERM_BP_FAT	GO:0044256	protein digestion	0.0729922
heart rate	GOTERM_BP_FAT	GO:0044254	multicellular organismal protein catabolic process	0.0729922
heart rate	GOTERM_BP_FAT	GO:0044268	multicellular organismal protein metabolic process	0.0686049
heart rate	GOTERM_BP_FAT	GO:0006163	purine nucleotide metabolic process	0.125328
heart rate	INTERPRO	IPR000695:ATPase, P-type, H+ transporting proton pump		0.110035
heart rate	GOTERM_BP_FAT	GO:0044271	nitrogen compound biosynthetic process	0.106387
heart rate	GOTERM_BP_FAT	GO:0006164	purine nucleotide biosynthetic process	0.106041
heart rate	INTERPRO	IPR006068:ATPase, P-type cation-transporter, C-terminal		0.104432
heart rate	GOTERM_MF_FAT	GO:0005388	calcium-transporting ATPase activity	0.102292
heart rate	INTERPRO	IPR004014:ATPase, P-type cation-transporter, N-terminal		0.098971
heart rate	UP_SEQ_FEATURE	metal ion-binding site:Magnesium		0.0975833
heart rate	SP_PIR_KEYWORDS	calcium transport		0.0963225
heart rate	GOTERM_MF_FAT	GO:0015085	calcium ion transmembrane transporter activity	0.0910242
heart rate	GOTERM_BP_FAT	GO:0009165	nucleotide biosynthetic process	0.0884414
heart rate	INTERPRO	IPR005834:Haloacid dehalogenase-like hydrolase		0.0869867
heart rate	PIR_SUPERFAMILY	PIRSF001297:Na(+)/K(+)-transporting ATPase alpha chain		0.0865556
heart rate	GOTERM_BP_FAT	GO:0034404	nucleobase, nucleoside and nucleotide biosynthetic process	0.0849273
heart rate	GOTERM_BP_FAT	GO:0034654	nucleobase, nucleoside, nucleotide and nucleic acid biosynthetic process	0.0849273
heart rate	UP_SEQ_FEATURE	active site:4-aspartylphosphate intermediate		0.0816228
heart rate	INTERPRO	IPR001757:ATPase, P-type, K/Mg/Cd/Cu/Zn/Na/Ca/Na/H-transporter		0.0803783
heart rate	INTERPRO	IPR018303:ATPase, P-type phosphorylation site		0.0803783
heart rate	INTERPRO	IPR008250:ATPase, P-type, ATPase-associated region		0.0803783
heart rate	INTERPRO	IPR005782:ATPase, P-type, calcium-transporting		0.0749282
heart rate	GOTERM_MF_FAT	GO:0015662	ATPase activity, coupled to transmembrane movement of ions, phosphorylative mechanism	0.0738587
heart rate	GOTERM_BP_FAT	GO:0009144	purine nucleoside triphosphate metabolic process	0.0738576
heart rate	GOTERM_MF_FAT	GO:0019829	cation-transporting ATPase activity	0.0735662
heart rate	GOTERM_BP_FAT	GO:0046034	ATP metabolic process	0.0719797
heart rate	GOTERM_BP_FAT	GO:0009141	nucleoside triphosphate metabolic process	0.0696025
heart rate	GOTERM_BP_FAT	GO:0009259	ribonucleotide metabolic process	0.0675045
heart rate	GOTERM_BP_FAT	GO:0009150	purine ribonucleotide metabolic process	0.0666853
heart rate	GOTERM_BP_FAT	GO:0009205	purine ribonucleoside triphosphate metabolic process	0.0662765
heart rate	GOTERM_MF_FAT	GO:0042625	ATPase activity, coupled to transmembrane movement of ions	0.0661977
heart rate	GOTERM_BP_FAT	GO:0009199	ribonucleoside triphosphate metabolic process	0.0658539
heart rate	GOTERM_BP_FAT	GO:0009145	purine nucleoside triphosphate biosynthetic process	0.0646412
heart rate	GOTERM_MF_FAT	GO:0042626	ATPase activity, coupled to transmembrane movement of substances	0.0646187
heart rate	GOTERM_BP_FAT	GO:0006754	ATP biosynthetic process	0.0642773
heart rate	GOTERM_MF_FAT	GO:0043492	ATPase activity, coupled to movement of substances	0.0642
heart rate	GOTERM_MF_FAT	GO:0016820	hydrolase activity, acting on acid anhydrides, catalyzing transmembrane movement of substances	0.0637891
heart rate	GOTERM_BP_FAT	GO:0009142	nucleoside triphosphate biosynthetic process	0.0633492
heart rate	GOTERM_MF_FAT	GO:0015082	di-, tri-valent inorganic cation transmembrane transporter activity	0.0632563
heart rate	GOTERM_MF_FAT	GO:0022890	inorganic cation transmembrane transporter activity	0.0616093
heart rate	GOTERM_BP_FAT	GO:0009206	purine ribonucleoside triphosphate biosynthetic process	0.0604768
heart rate	GOTERM_BP_FAT	GO:0009201	ribonucleoside triphosphate biosynthetic process	0.0600983
heart rate	GOTERM_MF_FAT	GO:0015405	P-P-bond-hydrolysis-driven transmembrane transporter activity	0.0597441
heart rate	GOTERM_MF_FAT	GO:0015399	primary active transmembrane transporter activity	0.0597441
heart rate	GOTERM_BP_FAT	GO:0009260	ribonucleotide biosynthetic process	0.0594513
heart rate	GOTERM_BP_FAT	GO:0009152	purine ribonucleotide biosynthetic process	0.0579319
heart rate	GOTERM_MF_FAT	GO:0042623	ATPase activity, coupled	0.0474648
heart rate	GOTERM_MF_FAT	GO:0016887	ATPase activity	0.0455369
heart rate	GOTERM_BP_FAT	GO:0007260	tyrosine phosphorylation of STAT protein	0.122002
heart rate	BIOCARTA	h_ifngPathway:IFN gamma signaling pathway		0.0572771
heart rate	BBID	75.Stats_activators_of_Apoptosis		0.0502237
heart rate	GOTERM_BP_FAT	GO:0001508	regulation of action potential	0.1004
heart rate	GOTERM_BP_FAT	GO:0019228	regulation of action potential in neuron	0.0810037
heart rate	GOTERM_BP_FAT	GO:0008366	axon ensheathment	0.0682957
heart rate	GOTERM_BP_FAT	GO:0007272	ensheathment of neurons	0.0682957
heart rate	GOTERM_BP_FAT	GO:0042552	myelination	0.0641427
heart rate	GOTERM_CC_FAT	GO:0005783	endoplasmic reticulum	0.0909864
heart rate	SP_PIR_KEYWORDS	endoplasmic reticulum		0.0727129
heart rate	GOTERM_CC_FAT	GO:0044432	endoplasmic reticulum part	0.064913
heart rate	GOTERM_CC_FAT	GO:0019867	outer membrane	0.0888352
heart rate	GOTERM_CC_FAT	GO:0005741	mitochondrial outer membrane	0.0884839
heart rate	GOTERM_CC_FAT	GO:0031968	organelle outer membrane	0.078712
heart rate	GOTERM_CC_FAT	GO:0005740	mitochondrial envelope	0.0773106
heart rate	GOTERM_CC_FAT	GO:0031966	mitochondrial membrane	0.071217
heart rate	SP_PIR_KEYWORDS	mitochondrion outer membrane		0.0514807
heart rate	GOTERM_BP_FAT	GO:0009187	cyclic nucleotide metabolic process	0.150475
heart rate	GOTERM_BP_FAT	GO:0009123	nucleoside monophosphate metabolic process	0.131642
heart rate	GOTERM_BP_FAT	GO:0009190	cyclic nucleotide biosynthetic process	0.113614
heart rate	GOTERM_BP_FAT	GO:0009124	nucleoside monophosphate biosynthetic process	0.0934082
heart rate	GOTERM_BP_FAT	GO:0006171	cAMP biosynthetic process	0.0850565
heart rate	INTERPRO	IPR018297:Adenylyl cyclase class-3/4/guanylyl cyclase, conserved site		0.069848
heart rate	INTERPRO	IPR001054:Adenylyl cyclase class-3/4/guanylyl cyclase		0.069848
heart rate	SMART	SM00044:CYCc		0.0692492
heart rate	GOTERM_BP_FAT	GO:0034199	activation of protein kinase A activity	0.0671983
heart rate	GOTERM_MF_FAT	GO:0016849	phosphorus-oxygen lyase activity	0.061266
heart rate	GOTERM_MF_FAT	GO:0009975	cyclase activity	0.0603441
heart rate	SP_PIR_KEYWORDS	phosphorus-oxygen lyase		0.0590724
heart rate	SP_PIR_KEYWORDS	camp biosynthesis		0.0590724
heart rate	UP_SEQ_FEATURE	metal ion-binding site:Magnesium 2; via carbonyl oxygen		0.0568575
heart rate	UP_SEQ_FEATURE	metal ion-binding site:Magnesium 2		0.0555235
heart rate	UP_SEQ_FEATURE	metal ion-binding site:Magnesium 1		0.0550933
heart rate	GOTERM_MF_FAT	GO:0004016	adenylate cyclase activity	0.0535291
heart rate	KEGG_PATHWAY	hsa00230:Purine metabolism		0.0438165
heart rate	GOTERM_BP_FAT	GO:0048066	pigmentation during development	0.0977484
heart rate	GOTERM_BP_FAT	GO:0006582	melanin metabolic process	0.0837214
heart rate	GOTERM_BP_FAT	GO:0050931	pigment cell differentiation	0.0823251
heart rate	SP_PIR_KEYWORDS	Albinism		0.0787945
heart rate	GOTERM_BP_FAT	GO:0043473	pigmentation	0.0755678
heart rate	UP_SEQ_FEATURE	topological domain:Lumenal, melanosome		0.0753724
heart rate	INTERPRO	IPR002227:Tyrosinase		0.0737956
heart rate	INTERPRO	IPR008922:Di-copper centre-containing		0.0737956
heart rate	GOTERM_BP_FAT	GO:0030318	melanocyte differentiation	0.0715631
heart rate	GOTERM_BP_FAT	GO:0042438	melanin biosynthetic process	0.0710586
heart rate	SP_PIR_KEYWORDS	Melanin biosynthesis		0.0652287
[truncated: 36,490 more rows]
